# Supplementary material
Source: publisher figshare collection journal article supplement (https://springernature.figshare.com/ndownloader/files/13531973)
Supplement: Supplementary file [file 13531973]

**Assessment of 16S rRNA gene primers for studying bacterial community  
structure and function of aging flue-cured tobaccos**

Fan Wang<sup>1,2</sup>, Xiao Men<sup>1,2</sup>, Ge Zhang<sup>1,2</sup>, Kaichao Liang<sup>3</sup>, Yuhua Xin<sup>3</sup>, Juan Wang<sup>3</sup>, Aijun Li<sup>3</sup>, Haibo Zhang<sup>1,2\*</sup>, Haobao Liu<sup>3,4\*</sup>, Lijun Wu<sup>5\*</sup>

<sup>1</sup>CAS Key Laboratory of Biobased Materials, Qingdao Institute of Bioenergy and Bioprocess Technology, Chinese Academy of Sciences, Qingdao 266101, China

<sup>2</sup>University of Chinese Academy of Sciences, Beijing 100049, China

<sup>3</sup> Hainan Cigar Research Institute Hainan Provincial Branch of China National Tobacco Corporation, Haikou 571100, Hainan, China

<sup>4</sup> Tobacco Research Institute of Chinese Academy of Agriculture Sciences, Qingdao 266101, Shandong, China

<sup>5</sup>Yunnan Academy of Tobacco Sciences, Kunming 650106, China;

\* Corresponding author

E-mail: zhanghb@qibebt.ac.cn (H. Zhang), liuhaobao@caas.cn (H. Liu), 2818429250@qq.com (L. Wu)  
Tel: +86 139 6978 0438 (H. Zhang), +86 182 5325 0799 (H. Liu), +86 136 5883 4314 (L. Wu)  
Fax: +86 0532 8066 2765 (H. Zhang), +86 0532 8066 2766 (H. Liu), +86 0871 6586 9642 (L. Wu)

**Table Captions**

**Table S1** Results of PICRUSt at level 3 KEGG Orthology using the V1-V3 amplification regions.

**Table S2** Results of PICRUSt at level 3 KEGG Orthology using the V3-V4 amplification regions.

**Table S3** Results of PICRUSt at level 3 KEGG Orthology using the V4-V5 amplification regions.

**Table S4** Results of PICRUSt at level 3 KEGG Orthology using the V5-V7 amplification regions.

Table S1 Results of PICRUSt at level 3 KEGG Orthology using the V1-V3 amplification regions.

| OTU ID                                                           | B1(V1V3 ) | A1(V1V3 ) | KEGG Pathways                                                                                                           |
|------------------------------------------------------------------|-----------|-----------|-------------------------------------------------------------------------------------------------------------------------|
| 1,1,1-Trichloro-2,2-bis(4-chlorophenyl) ethane (DDT) degradation | 17        | 19        | Metabolism; Xenobiotics Biodegradation and Metabolism; 1,1,1-Trichloro-2,2-bis(4-chlorophenyl) ethane (DDT) degradation |
| ABC transporters                                                 | 465709    | 811389    | Environmental Information Processing; Membrane Transport; ABC transporters                                              |
| Adipocytokine signaling pathway                                  | 9552      | 15886     | Organismal Systems; Endocrine System; Adipocytokine signaling pathway                                                   |
| African trypanosomiasis                                          | 1359      | 1359      | Human Diseases; Infectious Diseases; African trypanosomiasis                                                            |
| Alanine, aspartate and glutamate metabolism                      | 114209    | 196658    | Metabolism; Amino Acid Metabolism; Alanine, aspartate and glutamate metabolism                                          |
| Aldosterone-regulated sodium reabsorption                        | 0         | 2         | Organismal Systems; Excretory System; Aldosterone-regulated sodium reabsorption                                         |
| Alzheimer's disease                                              | 10020     | 13589     | Human Diseases; Neurodegenerative Diseases; Alzheimer's disease                                                         |
| Amino acid metabolism                                            | 37618     | 68098     | Unclassified; Metabolism; Amino acid metabolism                                                                         |
| Amino acid related enzymes                                       | 160923    | 273469    | Metabolism; Amino Acid Metabolism; Amino acid related enzymes                                                           |
| Amino sugar and nucleotide sugar metabolism                      | 148916    | 261893    | Metabolism; Carbohydrate Metabolism; Amino sugar and nucleotide sugar metabolism                                        |
| Aminoacyl-tRNA biosynthesis                                      | 137222    | 238905    | Genetic Information Processing; Translation; Aminoacyl-tRNA biosynthesis                                                |
| Aminobenzoate degradation                                        | 36562     | 53925     | Metabolism; Xenobiotics Biodegradation and Metabolism; Aminobenzoate degradation                                        |
| Amoebiasis                                                       | 3773      | 7181      | Human Diseases; Infectious Diseases; Amoebiasis                                                                         |
| Amyotrophic lateral sclerosis (ALS)                              | 3612      | 3013      | Human Diseases; Neurodegenerative Diseases; Amyotrophic lateral sclerosis (ALS)                                         |
| Antigen processing and presentation                              | 4179      | 7862      | Organismal Systems; Immune System; Antigen processing and presentation                                                  |
| Apoptosis                                                        | 2009      | 1784      | Cellular Processes; Cell Growth and Death; Apoptosis                                                                    |
| Arachidonic acid metabolism                                      | 10041     | 16193     | Metabolism; Lipid Metabolism; Arachidonic acid metabolism                                                               |
| Arginine and proline metabolism                                  | 170133    | 297529    | Metabolism; Amino Acid Metabolism; Arginine and proline metabolism                                                      |
| Ascorbate and aldarate metabolism                                | 18444     | 27405     | Metabolism; Carbohydrate Metabolism; Ascorbate and aldarate metabolism                                                  |
| Atrazine degradation                                             | 11917     | 22602     | Metabolism; Xenobiotics Biodegradation and Metabolism; Atrazine degradation                                             |
| Bacterial chemotaxis                                             | 37441     | 41220     | Cellular Processes; Cell Motility; Bacterial chemotaxis                                                                 |
| Bacterial invasion of epithelial cells                           | 3343      | 6882      | Human Diseases; Infectious Diseases; Bacterial invasion of epithelial cells                                             |
| Bacterial motility proteins                                      | 174772    | 275385    | Cellular Processes; Cell Motility; Bacterial motility proteins                                                          |
| Bacterial secretion system                                       | 84775     | 128020    | Environmental Information Processing; Membrane Transport; Bacterial secretion system                                    |
| Bacterial toxins                                                 | 9491      | 15692     | Environmental Information Processing; Signaling Molecules and Interaction; Bacterial toxins                             |
| Basal transcription factors                                      | 137       | 99        | Genetic Information Processing; Transcription; Basal transcription factors                                              |
| Base excision repair                                             | 50743     | 84223     | Genetic Information Processing; Replication and Repair; Base excision repair                                            |
| Benzoate degradation                                             | 37603     | 45891     | Metabolism; Xenobiotics Biodegradation and Metabolism; Benzoate degradation                                             |
| Betalain biosynthesis                                            | 43        | 20        | Metabolism; Biosynthesis of Other Secondary Metabolites; Betalain biosynthesis                                          |
| Bile secretion                                                   | 77        | 87        | Organismal Systems; Digestive System; Bile secretion                                                                    |
| Biosynthesis and biodegradation of secondary metabolites         | 10625     | 17044     | Unclassified; Metabolism; Biosynthesis and biodegradation of secondary metabolites                                      |
| Biosynthesis of 12-, 14- and 16-membered macrolides              | 3         | 2         | Metabolism; Metabolism of Terpenoids and Polyketides; Biosynthesis of 12-, 14- and 16-membered macrolides               |
| Biosynthesis of ansamycins                                       | 5630      | 8841      | Metabolism; Metabolism of Terpenoids and Polyketides; Biosynthesis of ansamycins                                        |
| Biosynthesis of siderophore group nonribosomal peptides          | 5855      | 8959      | Metabolism; Metabolism of Terpenoids and Polyketides; Biosynthesis of siderophore group nonribosomal peptides           |

|                                                 |        |        |                                                                                                        |
|-------------------------------------------------|--------|--------|--------------------------------------------------------------------------------------------------------|
| Biosynthesis of type II polyketide backbone     | 3      | 6      | Metabolism; Metabolism of Terpenoids and Polyketides; Biosynthesis of type II polyketide backbone      |
| Biosynthesis of type II polyketide products     | 134    | 64     | Metabolism; Metabolism of Terpenoids and Polyketides; Biosynthesis of type II polyketide products      |
| Biosynthesis of unsaturated fatty acids         | 30282  | 50104  | Metabolism; Lipid Metabolism; Biosynthesis of unsaturated fatty acids                                  |
| Biosynthesis of vancomycin group antibiotics    | 8020   | 14871  | Metabolism; Metabolism of Terpenoids and Polyketides; Biosynthesis of vancomycin group antibiotics     |
| Biotin metabolism                               | 21945  | 38598  | Metabolism; Metabolism of Cofactors and Vitamins; Biotin metabolism                                    |
| Bisphenol degradation                           | 8402   | 10383  | Metabolism; Xenobiotics Biodegradation and Metabolism; Bisphenol degradation                           |
| Bladder cancer                                  | 477    | 401    | Human Diseases; Cancers; Bladder cancer                                                                |
| Butanoate metabolism                            | 86073  | 119029 | Metabolism; Carbohydrate Metabolism; Butanoate metabolism                                              |
| Butirosin and neomycin biosynthesis             | 7640   | 14573  | Metabolism; Biosynthesis of Other Secondary Metabolites; Butirosin and neomycin biosynthesis           |
| C5-Branched dibasic acid metabolism             | 35149  | 57608  | Metabolism; Carbohydrate Metabolism; C5-Branched dibasic acid metabolism                               |
| Caffeine metabolism                             | 84     | 105    | Metabolism; Biosynthesis of Other Secondary Metabolites; Caffeine metabolism                           |
| Calcium signaling pathway                       | 3216   | 6850   | Environmental Information Processing; Signal Transduction; Calcium signaling pathway                   |
| Caprolactam degradation                         | 15394  | 16128  | Metabolism; Xenobiotics Biodegradation and Metabolism; Caprolactam degradation                         |
| Carbohydrate digestion and absorption           | 3643   | 7194   | Organismal Systems; Digestive System; Carbohydrate digestion and absorption                            |
| Carbohydrate metabolism                         | 31712  | 59603  | Unclassified; Metabolism; Carbohydrate metabolism                                                      |
| Carbon fixation in photosynthetic organisms     | 91869  | 168548 | Metabolism; Energy Metabolism; Carbon fixation in photosynthetic organisms                             |
| Carbon fixation pathways in prokaryotes         | 109245 | 173979 | Metabolism; Energy Metabolism; Carbon fixation pathways in prokaryotes                                 |
| Cardiac muscle contraction                      | 3013   | 3247   | Organismal Systems; Circulatory System; Cardiac muscle contraction                                     |
| Carotenoid biosynthesis                         | 28018  | 56352  | Metabolism; Metabolism of Terpenoids and Polyketides; Carotenoid biosynthesis                          |
| Cell cycle - Caulobacter                        | 74323  | 126329 | Cellular Processes; Cell Growth and Death; Cell cycle - Caulobacter                                    |
| Cell division                                   | 9961   | 16585  | Unclassified; Cellular Processes and Signaling; Cell division                                          |
| Cell motility and secretion                     | 36694  | 63998  | Unclassified; Cellular Processes and Signaling; Cell motility and secretion                            |
| Cellular antigens                               | 9640   | 15925  | Environmental Information Processing; Signaling Molecules and Interaction; Cellular antigens           |
| Chagas disease (American trypanosomiasis)       | 1323   | 1300   | Human Diseases; Infectious Diseases; Chagas disease (American trypanosomiasis)                         |
| Chaperones and folding catalysts                | 147552 | 261322 | Genetic Information Processing; Folding, Sorting and Degradation; Chaperones and folding catalysts     |
| Chloroalkane and chloroalkene degradation       | 35209  | 56704  | Metabolism; Xenobiotics Biodegradation and Metabolism; Chloroalkane and chloroalkene degradation       |
| Chlorocyclohexane and chlorobenzene degradation | 14023  | 23928  | Metabolism; Xenobiotics Biodegradation and Metabolism; Chlorocyclohexane and chlorobenzene degradation |
| Chromosome                                      | 200954 | 354658 | Genetic Information Processing; Replication and Repair; Chromosome                                     |
| Circadian rhythm - plant                        | 409    | 269    | Organismal Systems; Environmental Adaptation; Circadian rhythm - plant                                 |
| Citrate cycle (TCA cycle)                       | 71726  | 108043 | Metabolism; Carbohydrate Metabolism; Citrate cycle (TCA cycle)                                         |
| Clavulanic acid biosynthesis                    | 2      | 30     | Metabolism; Biosynthesis of Other Secondary Metabolites; Clavulanic acid biosynthesis                  |
| Colorectal cancer                               | 1865   | 1736   | Human Diseases; Cancers; Colorectal cancer                                                             |
| Cyanoamino acid metabolism                      | 32204  | 55319  | Metabolism; Metabolism of Other Amino Acids; Cyanoamino acid metabolism                                |
| Cysteine and methionine metabolism              | 100551 | 168544 | Metabolism; Amino Acid Metabolism; Cysteine and methionine metabolism                                  |
| Cytochrome P450                                 | 55     | 36     | Metabolism; Enzyme Families; Cytochrome P450                                                           |
| Cytoskeleton proteins                           | 45187  | 83590  | Cellular Processes; Cell Motility; Cytoskeleton proteins                                               |

|                                                            |        |        |                                                                                                        |
|------------------------------------------------------------|--------|--------|--------------------------------------------------------------------------------------------------------|
| D-Alanine metabolism                                       | 9790   | 16110  | Metabolism; Metabolism of Other Amino Acids; D-Alanine metabolism                                      |
| D-Arginine and D-ornithine metabolism                      | 257    | 251    | Metabolism; Metabolism of Other Amino Acids; D-Arginine and D-ornithine metabolism                     |
| D-Glutamine and D-glutamate metabolism                     | 18242  | 31753  | Metabolism; Metabolism of Other Amino Acids; D-Glutamine and D-glutamate metabolism                    |
| DNA repair and recombination proteins                      | 337127 | 584365 | Genetic Information Processing; Replication and Repair; DNA repair and recombination proteins          |
| DNA replication                                            | 65272  | 110366 | Genetic Information Processing; Replication and Repair; DNA replication                                |
| DNA replication proteins                                   | 121451 | 208062 | Genetic Information Processing; Replication and Repair; DNA replication proteins                       |
| Dioxin degradation                                         | 9772   | 16109  | Metabolism; Xenobiotics Biodegradation and Metabolism; Dioxin degradation                              |
| Drug metabolism - cytochrome P450                          | 38076  | 64063  | Metabolism; Xenobiotics Biodegradation and Metabolism; Drug metabolism - cytochrome P450               |
| Drug metabolism - other enzymes                            | 17929  | 26626  | Metabolism; Xenobiotics Biodegradation and Metabolism; Drug metabolism - other enzymes                 |
| Electron transfer carriers                                 | 5085   | 8317   | Unclassified; Cellular Processes and Signaling; Electron transfer carriers                             |
| Endocytosis                                                | 10     | 12     | Cellular Processes; Transport and Catabolism; Endocytosis                                              |
| Energy metabolism                                          | 82460  | 129208 | Unclassified; Metabolism; Energy metabolism                                                            |
| Epithelial cell signaling in Helicobacter pylori infection | 7872   | 14792  | Human Diseases; Infectious Diseases; Epithelial cell signaling in Helicobacter pylori infection        |
| Ether lipid metabolism                                     | 526    | 311    | Metabolism; Lipid Metabolism; Ether lipid metabolism                                                   |
| Ethylbenzene degradation                                   | 6503   | 9329   | Metabolism; Xenobiotics Biodegradation and Metabolism; Ethylbenzene degradation                        |
| Fatty acid biosynthesis                                    | 63434  | 107108 | Metabolism; Lipid Metabolism; Fatty acid biosynthesis                                                  |
| Fatty acid elongation in mitochondria                      | 1      | 0      | Metabolism; Lipid Metabolism; Fatty acid elongation in mitochondria                                    |
| Fatty acid metabolism                                      | 71833  | 107393 | Metabolism; Lipid Metabolism; Fatty acid metabolism                                                    |
| Fc gamma R-mediated phagocytosis                           | 10     | 12     | Organismal Systems; Immune System; Fc gamma R-mediated phagocytosis                                    |
| Flagellar assembly                                         | 30243  | 21357  | Cellular Processes; Cell Motility; Flagellar assembly                                                  |
| Flavone and flavonol biosynthesis                          | 53     | 11     | Metabolism; Biosynthesis of Other Secondary Metabolites; Flavone and flavonol biosynthesis             |
| Flavonoid biosynthesis                                     | 10253  | 20953  | Metabolism; Biosynthesis of Other Secondary Metabolites; Flavonoid biosynthesis                        |
| Fluorobenzoate degradation                                 | 9578   | 16019  | Metabolism; Xenobiotics Biodegradation and Metabolism; Fluorobenzoate degradation                      |
| Folate biosynthesis                                        | 61916  | 108625 | Metabolism; Metabolism of Cofactors and Vitamins; Folate biosynthesis                                  |
| Fructose and mannose metabolism                            | 93259  | 161732 | Metabolism; Carbohydrate Metabolism; Fructose and mannose metabolism                                   |
| Function unknown                                           | 199274 | 324384 | Unclassified; Poorly Characterized; Function unknown                                                   |
| G protein-coupled receptors                                | 7      | 1      | Environmental Information Processing; Signaling Molecules and Interaction; G protein-coupled receptors |
| Galactose metabolism                                       | 44329  | 72912  | Metabolism; Carbohydrate Metabolism; Galactose metabolism                                              |
| General function prediction only                           | 505671 | 883436 | Unclassified; Poorly Characterized; General function prediction only                                   |
| Geraniol degradation                                       | 22029  | 25716  | Metabolism; Metabolism of Terpenoids and Polyketides; Geraniol degradation                             |
| Germination                                                | 277    | 144    | Unclassified; Cellular Processes and Signaling; Germination                                            |
| Glutamatergic synapse                                      | 12978  | 23452  | Organismal Systems; Nervous System; Glutamatergic synapse                                              |
| Glutathione metabolism                                     | 73121  | 121663 | Metabolism; Metabolism of Other Amino Acids; Glutathione metabolism                                    |
| Glycan biosynthesis and metabolism                         | 9480   | 15955  | Unclassified; Metabolism; Glycan biosynthesis and metabolism                                           |
| Glycerolipid metabolism                                    | 44801  | 78141  | Metabolism; Lipid Metabolism; Glycerolipid metabolism                                                  |
| Glycerophospholipid metabolism                             | 58555  | 94606  | Metabolism; Lipid Metabolism; Glycerophospholipid metabolism                                           |
| Glycine, serine and threonine metabolism                   | 94965  | 154230 | Metabolism; Amino Acid Metabolism; Glycine, serine and threonine metabolism                            |
| Glycolysis / Gluconeogenesis                               | 148426 | 259407 | Metabolism; Carbohydrate Metabolism; Glycolysis /                                                      |

|                                                            |       |        |                                                                                                            |
|------------------------------------------------------------|-------|--------|------------------------------------------------------------------------------------------------------------|
|                                                            |       |        | Gluconeogenesis                                                                                            |
| Glycosaminoglycan degradation                              | 1342  | 881    | Metabolism; Glycan Biosynthesis and Metabolism; Glycosaminoglycan degradation                              |
| Glycosphingolipid biosynthesis - ganglio series            | 827   | 572    | Metabolism; Glycan Biosynthesis and Metabolism; Glycosphingolipid biosynthesis - ganglio series            |
| Glycosphingolipid biosynthesis - globo series              | 1450  | 1071   | Metabolism; Glycan Biosynthesis and Metabolism; Glycosphingolipid biosynthesis - globo series              |
| Glycosphingolipid biosynthesis - lacto and neolacto series | 24    | 9      | Metabolism; Glycan Biosynthesis and Metabolism; Glycosphingolipid biosynthesis - lacto and neolacto series |
| Glycosyltransferases                                       | 75311 | 140843 | Metabolism; Glycan Biosynthesis and Metabolism; Glycosyltransferases                                       |
| Glyoxylate and dicarboxylate metabolism                    | 79617 | 123168 | Metabolism; Carbohydrate Metabolism; Glyoxylate and dicarboxylate metabolism                               |
| GnRH signaling pathway                                     | 10    | 12     | Organismal Systems; Endocrine System; GnRH signaling pathway                                               |
| Hematopoietic cell lineage                                 | 0     | 4      | Organismal Systems; Immune System; Hematopoietic cell lineage                                              |
| Histidine metabolism                                       | 64458 | 110144 | Metabolism; Amino Acid Metabolism; Histidine metabolism                                                    |
| Homologous recombination                                   | 99218 | 172296 | Genetic Information Processing; Replication and Repair; Homologous recombination                           |
| Huntington's disease                                       | 13897 | 20828  | Human Diseases; Neurodegenerative Diseases; Huntington's disease                                           |
| Hypertrophic cardiomyopathy (HCM)                          | 70    | 41     | Human Diseases; Cardiovascular Diseases; Hypertrophic cardiomyopathy (HCM)                                 |
| Indole alkaloid biosynthesis                               | 37    | 19     | Metabolism; Biosynthesis of Other Secondary Metabolites; Indole alkaloid biosynthesis                      |
| Influenza A                                                | 1865  | 1737   | Human Diseases; Infectious Diseases; Influenza A                                                           |
| Inorganic ion transport and metabolism                     | 29100 | 39717  | Unclassified; Cellular Processes and Signaling; Inorganic ion transport and metabolism                     |
| Inositol phosphate metabolism                              | 18230 | 27960  | Metabolism; Carbohydrate Metabolism; Inositol phosphate metabolism                                         |
| Insulin signaling pathway                                  | 20960 | 42419  | Organismal Systems; Endocrine System; Insulin signaling pathway                                            |
| Ion channels                                               | 4335  | 7691   | Environmental Information Processing; Signaling Molecules and Interaction; Ion channels                    |
| Isoflavonoid biosynthesis                                  | 6     | 2      | Metabolism; Biosynthesis of Other Secondary Metabolites; Isoflavonoid biosynthesis                         |
| Isoquinoline alkaloid biosynthesis                         | 5829  | 9147   | Metabolism; Biosynthesis of Other Secondary Metabolites; Isoquinoline alkaloid biosynthesis                |
| Leishmaniasis                                              | 1     | 0      | Human Diseases; Infectious Diseases; Leishmaniasis                                                         |
| Limonene and pinene degradation                            | 25098 | 32657  | Metabolism; Metabolism of Terpenoids and Polyketides; Limonene and pinene degradation                      |
| Linoleic acid metabolism                                   | 3443  | 1997   | Metabolism; Lipid Metabolism; Linoleic acid metabolism                                                     |
| Lipid biosynthesis proteins                                | 92518 | 155749 | Metabolism; Lipid Metabolism; Lipid biosynthesis proteins                                                  |
| Lipid metabolism                                           | 22002 | 39518  | Unclassified; Metabolism; Lipid metabolism                                                                 |
| Lipoic acid metabolism                                     | 16093 | 30382  | Metabolism; Metabolism of Cofactors and Vitamins; Lipoic acid metabolism                                   |
| Lipopolysaccharide biosynthesis                            | 32901 | 55010  | Metabolism; Glycan Biosynthesis and Metabolism; Lipopolysaccharide biosynthesis                            |
| Lipopolysaccharide biosynthesis proteins                   | 41416 | 65691  | Metabolism; Glycan Biosynthesis and Metabolism; Lipopolysaccharide biosynthesis proteins                   |
| Lysine biosynthesis                                        | 74381 | 124610 | Metabolism; Amino Acid Metabolism; Lysine biosynthesis                                                     |
| Lysine degradation                                         | 34565 | 44700  | Metabolism; Amino Acid Metabolism; Lysine degradation                                                      |
| Lysosome                                                   | 1920  | 1288   | Cellular Processes; Transport and Catabolism; Lysosome                                                     |
| MAPK signaling pathway - yeast                             | 5041  | 8192   | Environmental Information Processing; Signal Transduction; MAPK signaling pathway - yeast                  |
| Meiosis - yeast                                            | 14435 | 28764  | Cellular Processes; Cell Growth and Death; Meiosis - yeast                                                 |
| Melanogenesis                                              | 6     | 4      | Organismal Systems; Endocrine System; Melanogenesis                                                        |
| Membrane and intracellular structural molecules            | 82220 | 130344 | Unclassified; Cellular Processes and Signaling; Membrane and intracellular structural molecules            |
| Metabolism of cofactors and vitamins                       | 24658 | 40463  | Unclassified; Metabolism; Metabolism of cofactors and vitamins                                             |
| Metabolism of xenobiotics by cytochrome P450               | 37711 | 63773  | Metabolism; Xenobiotics Biodegradation and Metabolism; Metabolism of xenobiotics by                        |

|                                                     |        |        |                                                                                                                    |
|-----------------------------------------------------|--------|--------|--------------------------------------------------------------------------------------------------------------------|
|                                                     |        |        | cytochrome P450                                                                                                    |
| Methane metabolism                                  | 133705 | 233387 | Metabolism; Energy Metabolism; Methane metabolism                                                                  |
| Mineral absorption                                  | 10193  | 20938  | Organismal Systems; Digestive System; Mineral absorption                                                           |
| Mismatch repair                                     | 89243  | 155641 | Genetic Information Processing; Replication and Repair; Mismatch repair                                            |
| N-Glycan biosynthesis                               | 10937  | 21439  | Metabolism; Glycan Biosynthesis and Metabolism; N-Glycan biosynthesis                                              |
| NOD-like receptor signaling pathway                 | 4187   | 7865   | Organismal Systems; Immune System; NOD-like receptor signaling pathway                                             |
| Naphthalene degradation                             | 26464  | 42002  | Metabolism; Xenobiotics Biodegradation and Metabolism; Naphthalene degradation                                     |
| Neuroactive ligand-receptor interaction             | 0      | 1      | Environmental Information Processing; Signaling Molecules and Interaction; Neuroactive ligand-receptor interaction |
| Nicotinate and nicotinamide metabolism              | 55299  | 94627  | Metabolism; Metabolism of Cofactors and Vitamins; Nicotinate and nicotinamide metabolism                           |
| Nitrogen metabolism                                 | 82916  | 137576 | Metabolism; Energy Metabolism; Nitrogen metabolism                                                                 |
| Nitrotoluene degradation                            | 7098   | 9748   | Metabolism; Xenobiotics Biodegradation and Metabolism; Nitrotoluene degradation                                    |
| Non-homologous end-joining                          | 2095   | 1907   | Genetic Information Processing; Replication and Repair; Non-homologous end-joining                                 |
| Novobiocin biosynthesis                             | 14714  | 24512  | Metabolism; Biosynthesis of Other Secondary Metabolites; Novobiocin biosynthesis                                   |
| Nucleotide excision repair                          | 38855  | 66333  | Genetic Information Processing; Replication and Repair; Nucleotide excision repair                                 |
| Nucleotide metabolism                               | 2204   | 1725   | Unclassified; Metabolism; Nucleotide metabolism                                                                    |
| One carbon pool by folate                           | 62113  | 105729 | Metabolism; Metabolism of Cofactors and Vitamins; One carbon pool by folate                                        |
| Other glycan degradation                            | 7500   | 9678   | Metabolism; Glycan Biosynthesis and Metabolism; Other glycan degradation                                           |
| Other ion-coupled transporters                      | 130097 | 204989 | Unclassified; Cellular Processes and Signaling; Other ion-coupled transporters                                     |
| Other transporters                                  | 37610  | 63436  | Unclassified; Cellular Processes and Signaling; Other transporters                                                 |
| Others                                              | 170641 | 305270 | Unclassified; Metabolism; Others                                                                                   |
| Oxidative phosphorylation                           | 201736 | 353921 | Metabolism; Energy Metabolism; Oxidative phosphorylation                                                           |
| PPAR signaling pathway                              | 23503  | 39740  | Organismal Systems; Endocrine System; PPAR signaling pathway                                                       |
| Pancreatic secretion                                | 0      | 1      | Organismal Systems; Digestive System; Pancreatic secretion                                                         |
| Pantothenate and CoA biosynthesis                   | 79612  | 139859 | Metabolism; Metabolism of Cofactors and Vitamins; Pantothenate and CoA biosynthesis                                |
| Parkinson's disease                                 | 4880   | 4983   | Human Diseases; Neurodegenerative Diseases; Parkinson's disease                                                    |
| Pathogenic Escherichia coli infection               | 160    | 0      | Human Diseases; Infectious Diseases; Pathogenic Escherichia coli infection                                         |
| Pathways in cancer                                  | 10713  | 17835  | Human Diseases; Cancers; Pathways in cancer                                                                        |
| Penicillin and cephalosporin biosynthesis           | 5170   | 8220   | Metabolism; Biosynthesis of Other Secondary Metabolites; Penicillin and cephalosporin biosynthesis                 |
| Pentose and glucuronate interconversions            | 40569  | 61842  | Metabolism; Carbohydrate Metabolism; Pentose and glucuronate interconversions                                      |
| Pentose phosphate pathway                           | 104527 | 184723 | Metabolism; Carbohydrate Metabolism; Pentose phosphate pathway                                                     |
| Peptidases                                          | 265375 | 480417 | Metabolism; Enzyme Families; Peptidases                                                                            |
| Peptidoglycan biosynthesis                          | 88822  | 154227 | Metabolism; Glycan Biosynthesis and Metabolism; Peptidoglycan biosynthesis                                         |
| Peroxisome                                          | 31088  | 50191  | Cellular Processes; Transport and Catabolism; Peroxisome                                                           |
| Pertussis                                           | 6876   | 9570   | Human Diseases; Infectious Diseases; Pertussis                                                                     |
| Phenylalanine metabolism                            | 34661  | 53462  | Metabolism; Amino Acid Metabolism; Phenylalanine metabolism                                                        |
| Phenylalanine, tyrosine and tryptophan biosynthesis | 92424  | 161433 | Metabolism; Amino Acid Metabolism; Phenylalanine, tyrosine and tryptophan biosynthesis                             |
| Phenylpropanoid biosynthesis                        | 17314  | 30723  | Metabolism; Biosynthesis of Other Secondary Metabolites; Phenylpropanoid biosynthesis                              |
| Phosphatidylinositol signaling system               | 17335  | 31423  | Environmental Information Processing; Signal Transduction; Phosphatidylinositol signaling system                   |

|                                                |        |        |                                                                                                               |
|------------------------------------------------|--------|--------|---------------------------------------------------------------------------------------------------------------|
| Phosphonate and phosphinate metabolism         | 2757   | 1976   | Metabolism; Metabolism of Other Amino Acids; Phosphonate and phosphinate metabolism                           |
| Phosphotransferase system (PTS)                | 16107  | 11879  | Environmental Information Processing; Membrane Transport; Phosphotransferase system (PTS)                     |
| Photosynthesis                                 | 228365 | 470717 | Metabolism; Energy Metabolism; Photosynthesis                                                                 |
| Photosynthesis - antenna proteins              | 54655  | 116450 | Metabolism; Energy Metabolism; Photosynthesis - antenna proteins                                              |
| Photosynthesis proteins                        | 287370 | 594908 | Metabolism; Energy Metabolism; Photosynthesis proteins                                                        |
| Plant-pathogen interaction                     | 11568  | 18216  | Organismal Systems; Environmental Adaptation; Plant-pathogen interaction                                      |
| Polycyclic aromatic hydrocarbon degradation    | 17252  | 31027  | Metabolism; Xenobiotics Biodegradation and Metabolism; Polycyclic aromatic hydrocarbon degradation            |
| Polyketide sugar unit biosynthesis             | 27478  | 51420  | Metabolism; Metabolism of Terpenoids and Polyketides; Polyketide sugar unit biosynthesis                      |
| Pores ion channels                             | 87876  | 149032 | Unclassified; Cellular Processes and Signaling; Pores ion channels                                            |
| Porphyrin and chlorophyll metabolism           | 230681 | 442540 | Metabolism; Metabolism of Cofactors and Vitamins; Porphyrin and chlorophyll metabolism                        |
| Prenyltransferases                             | 64096  | 120581 | Metabolism; Metabolism of Terpenoids and Polyketides; Prenyltransferases                                      |
| Primary bile acid biosynthesis                 | 502    | 406    | Metabolism; Lipid Metabolism; Primary bile acid biosynthesis                                                  |
| Primary immunodeficiency                       | 4757   | 8017   | Human Diseases; Immune System Diseases; Primary immunodeficiency                                              |
| Prion diseases                                 | 651    | 446    | Human Diseases; Neurodegenerative Diseases; Prion diseases                                                    |
| Progesterone-mediated oocyte maturation        | 4179   | 7862   | Organismal Systems; Endocrine System; Progesterone-mediated oocyte maturation                                 |
| Propanoate metabolism                          | 76329  | 106662 | Metabolism; Carbohydrate Metabolism; Propanoate metabolism                                                    |
| Prostate cancer                                | 4180   | 7863   | Human Diseases; Cancers; Prostate cancer                                                                      |
| Proteasome                                     | 4398   | 8092   | Genetic Information Processing; Folding, Sorting and Degradation; Proteasome                                  |
| Protein digestion and absorption               | 393    | 243    | Organismal Systems; Digestive System; Protein digestion and absorption                                        |
| Protein export                                 | 72680  | 125143 | Genetic Information Processing; Folding, Sorting and Degradation; Protein export                              |
| Protein folding and associated processing      | 128299 | 230540 | Unclassified; Genetic Information Processing; Protein folding and associated processing                       |
| Protein kinases                                | 83268  | 156300 | Metabolism; Enzyme Families; Protein kinases                                                                  |
| Protein processing in endoplasmic reticulum    | 14788  | 29109  | Genetic Information Processing; Folding, Sorting and Degradation; Protein processing in endoplasmic reticulum |
| Proximal tubule bicarbonate reclamation        | 4375   | 7662   | Organismal Systems; Excretory System; Proximal tubule bicarbonate reclamation                                 |
| Purine metabolism                              | 270150 | 464741 | Metabolism; Nucleotide Metabolism; Purine metabolism                                                          |
| Pyrimidine metabolism                          | 177101 | 302688 | Metabolism; Nucleotide Metabolism; Pyrimidine metabolism                                                      |
| Pyruvate metabolism                            | 145775 | 248207 | Metabolism; Carbohydrate Metabolism; Pyruvate metabolism                                                      |
| RIG-I-like receptor signaling pathway          | 251    | 298    | Organismal Systems; Immune System; RIG-I-like receptor signaling pathway                                      |
| RNA degradation                                | 75528  | 138221 | Genetic Information Processing; Folding, Sorting and Degradation; RNA degradation                             |
| RNA polymerase                                 | 22100  | 39868  | Genetic Information Processing; Transcription; RNA polymerase                                                 |
| RNA transport                                  | 11843  | 21857  | Genetic Information Processing; Translation; RNA transport                                                    |
| Renal cell carcinoma                           | 4668   | 8237   | Human Diseases; Cancers; Renal cell carcinoma                                                                 |
| Renin-angiotensin system                       | 140    | 122    | Organismal Systems; Endocrine System; Renin-angiotensin system                                                |
| Replication, recombination and repair proteins | 129603 | 234334 | Unclassified; Genetic Information Processing; Replication, recombination and repair proteins                  |
| Restriction enzyme                             | 15217  | 28935  | Unclassified; Genetic Information Processing; Restriction enzyme                                              |
| Retinol metabolism                             | 16979  | 30404  | Metabolism; Metabolism of Cofactors and Vitamins; Retinol metabolism                                          |
| Riboflavin metabolism                          | 43445  | 77306  | Metabolism; Metabolism of Cofactors and Vitamins; Riboflavin metabolism                                       |
| Ribosome                                       | 258013 | 451741 | Genetic Information Processing; Translation;                                                                  |

|                                                        |        |         |                                                                                                                 |
|--------------------------------------------------------|--------|---------|-----------------------------------------------------------------------------------------------------------------|
|                                                        |        |         | Ribosome                                                                                                        |
| Ribosome Biogenesis                                    | 145636 | 247248  | Genetic Information Processing; Translation; Ribosome Biogenesis                                                |
| Ribosome biogenesis in eukaryotes                      | 5256   | 8638    | Genetic Information Processing; Translation; Ribosome biogenesis in eukaryotes                                  |
| Secondary bile acid biosynthesis                       | 135    | 122     | Metabolism; Lipid Metabolism; Secondary bile acid biosynthesis                                                  |
| Secretion system                                       | 221103 | 359887  | Environmental Information Processing; Membrane Transport; Secretion system                                      |
| Selenocompound metabolism                              | 44420  | 73573   | Metabolism; Metabolism of Other Amino Acids; Selenocompound metabolism                                          |
| Sesquiterpenoid biosynthesis                           | 1      | 4       | Metabolism; Metabolism of Terpenoids and Polyketides; Sesquiterpenoid biosynthesis                              |
| Shigellosis                                            | 92     | 16      | Human Diseases; Infectious Diseases; Shigellosis                                                                |
| Signal transduction mechanisms                         | 79152  | 143503  | Unclassified; Cellular Processes and Signaling; Signal transduction mechanisms                                  |
| Small cell lung cancer                                 | 1866   | 1736    | Human Diseases; Cancers; Small cell lung cancer                                                                 |
| Sphingolipid metabolism                                | 6060   | 8815    | Metabolism; Lipid Metabolism; Sphingolipid metabolism                                                           |
| Sporulation                                            | 9485   | 14675   | Unclassified; Cellular Processes and Signaling; Sporulation                                                     |
| Staphylococcus aureus infection                        | 643    | 366     | Human Diseases; Infectious Diseases; Staphylococcus aureus infection                                            |
| Starch and sucrose metabolism                          | 108082 | 196388  | Metabolism; Carbohydrate Metabolism; Starch and sucrose metabolism                                              |
| Steroid biosynthesis                                   | 6814   | 13908   | Metabolism; Lipid Metabolism; Steroid biosynthesis                                                              |
| Steroid hormone biosynthesis                           | 4213   | 7583    | Metabolism; Lipid Metabolism; Steroid hormone biosynthesis                                                      |
| Stilbenoid, diarylheptanoid and gingerol biosynthesis  | 7296   | 14404   | Metabolism; Biosynthesis of Other Secondary Metabolites; Stilbenoid, diarylheptanoid and gingerol biosynthesis  |
| Streptomycin biosynthesis                              | 48716  | 89980   | Metabolism; Biosynthesis of Other Secondary Metabolites; Streptomycin biosynthesis                              |
| Styrene degradation                                    | 8029   | 10382   | Metabolism; Xenobiotics Biodegradation and Metabolism; Styrene degradation                                      |
| Sulfur metabolism                                      | 45658  | 78121   | Metabolism; Energy Metabolism; Sulfur metabolism                                                                |
| Sulfur relay system                                    | 55338  | 99489   | Genetic Information Processing; Folding, Sorting and Degradation; Sulfur relay system                           |
| Synthesis and degradation of ketone bodies             | 6899   | 5138    | Metabolism; Lipid Metabolism; Synthesis and degradation of ketone bodies                                        |
| Systemic lupus erythematosus                           | 12     | 11      | Human Diseases; Immune System Diseases; Systemic lupus erythematosus                                            |
| Taurine and hypotaurine metabolism                     | 14814  | 24170   | Metabolism; Metabolism of Other Amino Acids; Taurine and hypotaurine metabolism                                 |
| Terpenoid backbone biosynthesis                        | 70590  | 123887  | Metabolism; Metabolism of Terpenoids and Polyketides; Terpenoid backbone biosynthesis                           |
| Tetracycline biosynthesis                              | 21240  | 37732   | Metabolism; Metabolism of Terpenoids and Polyketides; Tetracycline biosynthesis                                 |
| Thiamine metabolism                                    | 52865  | 92406   | Metabolism; Metabolism of Cofactors and Vitamins; Thiamine metabolism                                           |
| Toluene degradation                                    | 22548  | 36300   | Metabolism; Xenobiotics Biodegradation and Metabolism; Toluene degradation                                      |
| Toxoplasmosis                                          | 1865   | 1736    | Human Diseases; Infectious Diseases; Toxoplasmosis                                                              |
| Transcription factors                                  | 145561 | 221822  | Genetic Information Processing; Transcription; Transcription factors                                            |
| Transcription machinery                                | 94171  | 162229  | Genetic Information Processing; Transcription; Transcription machinery                                          |
| Transcription related proteins                         | 532    | 426     | Unclassified; Genetic Information Processing; Transcription related proteins                                    |
| Translation factors                                    | 59437  | 104928  | Genetic Information Processing; Translation; Translation factors                                                |
| Translation proteins                                   | 112230 | 197169  | Unclassified; Genetic Information Processing; Translation proteins                                              |
| Transporters                                           | 760110 | 1321677 | Environmental Information Processing; Membrane Transport; Transporters                                          |
| Tropane, piperidine and pyridine alkaloid biosynthesis | 14836  | 24757   | Metabolism; Biosynthesis of Other Secondary Metabolites; Tropane, piperidine and pyridine alkaloid biosynthesis |
| Tryptophan metabolism                                  | 46269  | 62257   | Metabolism; Amino Acid Metabolism; Tryptophan metabolism                                                        |
| Tuberculosis                                           | 41942  | 81064   | Human Diseases; Infectious Diseases; Tuberculosis                                                               |



|                                                     |        |        |                                                                                                       |
|-----------------------------------------------------|--------|--------|-------------------------------------------------------------------------------------------------------|
| Two-component system                                | 286219 | 481741 | Environmental Information Processing; Signal Transduction; Two-component system                       |
| Type I diabetes mellitus                            | 8354   | 15407  | Human Diseases; Metabolic Diseases; Type I diabetes mellitus                                          |
| Type II diabetes mellitus                           | 11199  | 21584  | Human Diseases; Metabolic Diseases; Type II diabetes mellitus                                         |
| Tyrosine metabolism                                 | 57894  | 96879  | Metabolism; Amino Acid Metabolism; Tyrosine metabolism                                                |
| Ubiquinone and other terpenoid-quinone biosynthesis | 80224  | 151385 | Metabolism; Metabolism of Cofactors and Vitamins; Ubiquinone and other terpenoid-quinone biosynthesis |
| Ubiquitin system                                    | 3646   | 7204   | Genetic Information Processing; Folding, Sorting and Degradation; Ubiquitin system                    |
| VEGF signaling pathway                              | 1      | 0      | Environmental Information Processing; Signal Transduction; VEGF signaling pathway                     |
| Valine, leucine and isoleucine biosynthesis         | 95958  | 166253 | Metabolism; Amino Acid Metabolism; Valine, leucine and isoleucine biosynthesis                        |
| Valine, leucine and isoleucine degradation          | 65052  | 86526  | Metabolism; Amino Acid Metabolism; Valine, leucine and isoleucine degradation                         |
| Various types of N-glycan biosynthesis              | 4      | 1      | Metabolism; Glycan Biosynthesis and Metabolism; Various types of N-glycan biosynthesis                |
| Vasopressin-regulated water reabsorption            | 3      | 0      | Organismal Systems; Excretory System; Vasopressin-regulated water reabsorption                        |
| Vibrio cholerae infection                           | 38     | 27     | Human Diseases; Infectious Diseases; Vibrio cholerae infection                                        |
| Vibrio cholerae pathogenic cycle                    | 19574  | 36650  | Human Diseases; Infectious Diseases; Vibrio cholerae pathogenic cycle                                 |
| Viral myocarditis                                   | 1865   | 1736   | Human Diseases; Cardiovascular Diseases; Viral myocarditis                                            |
| Vitamin B6 metabolism                               | 23098  | 39267  | Metabolism; Metabolism of Cofactors and Vitamins; Vitamin B6 metabolism                               |
| Xylene degradation                                  | 8684   | 15342  | Metabolism; Xenobiotics Biodegradation and Metabolism; Xylene degradation                             |
| Zeatin biosynthesis                                 | 4749   | 8264   | Metabolism; Metabolism of Terpenoids and Polyketides; Zeatin biosynthesis                             |
| alpha-Linolenic acid metabolism                     | 4784   | 8076   | Metabolism; Lipid Metabolism; alpha-Linolenic acid metabolism                                         |
| beta-Alanine metabolism                             | 42235  | 63073  | Metabolism; Metabolism of Other Amino Acids; beta-Alanine metabolism                                  |
| beta-Lactam resistance                              | 4796   | 7900   | Metabolism; Biosynthesis of Other Secondary Metabolites; beta-Lactam resistance                       |
| mRNA surveillance pathway                           | 5      | 0      | Genetic Information Processing; Translation; mRNA surveillance pathway                                |
| p53 signaling pathway                               | 1871   | 1741   | Cellular Processes; Cell Growth and Death; p53 signaling pathway                                      |

Table S2 Results of PICRUSt at level 3 KEGG Orthology using the V3-V4 amplification regions.

| OTU ID                                                          | B1(V3V4) | A1(V3V4) | KEGG Pathways                                                                                                           |
|-----------------------------------------------------------------|----------|----------|-------------------------------------------------------------------------------------------------------------------------|
| 1,1,1-Trichloro-2,2-bis(4-chlorophenyl)ethane (DDT) degradation | 70       | 47       | Metabolism; Xenobiotics Biodegradation and Metabolism; 1,1,1-Trichloro-2,2-bis(4-chlorophenyl) ethane (DDT) degradation |
| ABC transporters                                                | 838889   | 879449   | Environmental Information Processing; Membrane Transport; ABC transporters                                              |
| Adipocytokine signaling pathway                                 | 17270    | 16649    | Organismal Systems; Endocrine System; Adipocytokine signaling pathway                                                   |
| African trypanosomiasis                                         | 5354     | 2931     | Human Diseases; Infectious Diseases; African trypanosomiasis                                                            |
| Alanine, aspartate and glutamate metabolism                     | 219137   | 212031   | Metabolism; Amino Acid Metabolism; Alanine, aspartate and glutamate metabolism                                          |
| Aldosterone-regulated sodium reabsorption                       | 4        | 4        | Organismal Systems; Excretory System; Aldosterone-regulated sodium reabsorption                                         |
| Alzheimer's disease                                             | 32132    | 18582    | Human Diseases; Neurodegenerative Diseases; Alzheimer's disease                                                         |
| Amino acid metabolism                                           | 64578    | 68137    | Unclassified; Metabolism; Amino acid metabolism                                                                         |
| Amino acid related enzymes                                      | 340779   | 299913   | Metabolism; Amino Acid Metabolism; Amino acid related enzymes                                                           |
| Amino sugar and nucleotide sugar metabolism                     | 272091   | 275350   | Metabolism; Carbohydrate Metabolism; Amino sugar and nucleotide sugar metabolism                                        |
| Aminoacyl-tRNA biosynthesis                                     | 292026   | 250991   | Genetic Information Processing; Translation; Aminoacyl-tRNA biosynthesis                                                |
| Aminobenzoate degradation                                       | 84289    | 67494    | Metabolism; Xenobiotics Biodegradation and Metabolism; Aminobenzoate degradation                                        |
| Amoebiasis                                                      | 5517     | 6479     | Human Diseases; Infectious Diseases; Amoebiasis                                                                         |
| Amyotrophic lateral sclerosis (ALS)                             | 13843    | 6940     | Human Diseases; Neurodegenerative Diseases; Amyotrophic lateral sclerosis (ALS)                                         |
| Antigen processing and presentation                             | 8263     | 7823     | Organismal Systems; Immune System; Antigen processing and presentation                                                  |
| Apoptosis                                                       | 7519     | 2955     | Cellular Processes; Cell Growth and Death; Apoptosis                                                                    |
| Arachidonic acid metabolism                                     | 19823    | 17862    | Metabolism; Lipid Metabolism; Arachidonic acid metabolism                                                               |
| Arginine and proline metabolism                                 | 325255   | 316763   | Metabolism; Amino Acid Metabolism; Arginine and proline metabolism                                                      |
| Ascorbate and aldarate metabolism                               | 38742    | 37090    | Metabolism; Carbohydrate Metabolism; Ascorbate and aldarate metabolism                                                  |
| Atrazine degradation                                            | 20412    | 21850    | Metabolism; Xenobiotics Biodegradation and Metabolism; Atrazine degradation                                             |
| Bacterial chemotaxis                                            | 103528   | 71535    | Cellular Processes; Cell Motility; Bacterial chemotaxis                                                                 |
| Bacterial invasion of epithelial cells                          | 4586     | 5628     | Human Diseases; Infectious Diseases; Bacterial invasion of epithelial cells                                             |
| Bacterial motility proteins                                     | 363332   | 327790   | Cellular Processes; Cell Motility; Bacterial motility proteins                                                          |
| Bacterial secretion system                                      | 215325   | 164030   | Environmental Information Processing; Membrane Transport; Bacterial secretion system                                    |
| Bacterial toxins                                                | 17418    | 16794    | Environmental Information Processing; Signaling Molecules and Interaction; Bacterial toxins                             |
| Basal transcription factors                                     | 471      | 376      | Genetic Information Processing; Transcription; Basal transcription factors                                              |
| Base excision repair                                            | 108354   | 97076    | Genetic Information Processing; Replication and Repair; Base excision repair                                            |
| Benzoate degradation                                            | 95262    | 69926    | Metabolism; Xenobiotics Biodegradation and Metabolism; Benzoate degradation                                             |
| Betalain biosynthesis                                           | 96       | 73       | Metabolism; Biosynthesis of Other Secondary Metabolites; Betalain biosynthesis                                          |
| Bile secretion                                                  | 505      | 264      | Organismal Systems; Digestive System; Bile secretion                                                                    |
| Biosynthesis and biodegradation of secondary metabolites        | 20858    | 21725    | Unclassified; Metabolism; Biosynthesis and biodegradation of secondary metabolites                                      |
| Biosynthesis of 12-, 14- and 16-membered macrolides             | 24       | 42       | Metabolism; Metabolism of Terpenoids and Polyketides; Biosynthesis of 12-, 14- and 16-membered macrolides               |
| Biosynthesis of ansamycins                                      | 11427    | 11245    | Metabolism; Metabolism of Terpenoids and Polyketides; Biosynthesis of ansamycins                                        |
| Biosynthesis of siderophore group                               | 11936    | 13077    | Metabolism; Metabolism of Terpenoids and                                                                                |

|                                                 |        |        |                                                                                                        |
|-------------------------------------------------|--------|--------|--------------------------------------------------------------------------------------------------------|
| nonribosomal peptides                           |        |        | Polyketides; Biosynthesis of siderophore group nonribosomal peptides                                   |
| Biosynthesis of type II polyketide backbone     | 27     | 52     | Metabolism; Metabolism of Terpenoids and Polyketides; Biosynthesis of type II polyketide backbone      |
| Biosynthesis of type II polyketide products     | 43     | 76     | Metabolism; Metabolism of Terpenoids and Polyketides; Biosynthesis of type II polyketide products      |
| Biosynthesis of unsaturated fatty acids         | 60392  | 58599  | Metabolism; Lipid Metabolism; Biosynthesis of unsaturated fatty acids                                  |
| Biosynthesis of vancomycin group antibiotics    | 13808  | 14385  | Metabolism; Metabolism of Terpenoids and Polyketides; Biosynthesis of vancomycin group antibiotics     |
| Biotin metabolism                               | 40972  | 39829  | Metabolism; Metabolism of Cofactors and Vitamins; Biotin metabolism                                    |
| Bisphenol degradation                           | 17194  | 14009  | Metabolism; Xenobiotics Biodegradation and Metabolism; Bisphenol degradation                           |
| Bladder cancer                                  | 1709   | 1305   | Human Diseases; Cancers; Bladder cancer                                                                |
| Butanoate metabolism                            | 203754 | 163909 | Metabolism; Carbohydrate Metabolism; Butanoate metabolism                                              |
| Butirosin and neomycin biosynthesis             | 13108  | 14191  | Metabolism; Biosynthesis of Other Secondary Metabolites; Butirosin and neomycin biosynthesis           |
| C5-Branched dibasic acid metabolism             | 72014  | 65403  | Metabolism; Carbohydrate Metabolism; C5-Branched dibasic acid metabolism                               |
| CAM ligands                                     | 1      | 0      | Environmental Information Processing; Signaling Molecules and Interaction; CAM ligands                 |
| Caffeine metabolism                             | 454    | 388    | Metabolism; Biosynthesis of Other Secondary Metabolites; Caffeine metabolism                           |
| Calcium signaling pathway                       | 4439   | 5578   | Environmental Information Processing; Signal Transduction; Calcium signaling pathway                   |
| Caprolactam degradation                         | 40077  | 28226  | Metabolism; Xenobiotics Biodegradation and Metabolism; Caprolactam degradation                         |
| Carbohydrate digestion and absorption           | 5547   | 6819   | Organismal Systems; Digestive System; Carbohydrate digestion and absorption                            |
| Carbohydrate metabolism                         | 54434  | 58884  | Unclassified; Metabolism; Carbohydrate metabolism                                                      |
| Carbon fixation in photosynthetic organisms     | 169724 | 167170 | Metabolism; Energy Metabolism; Carbon fixation in photosynthetic organisms                             |
| Carbon fixation pathways in prokaryotes         | 240234 | 204720 | Metabolism; Energy Metabolism; Carbon fixation pathways in prokaryotes                                 |
| Cardiac muscle contraction                      | 13187  | 5807   | Organismal Systems; Circulatory System; Cardiac muscle contraction                                     |
| Carotenoid biosynthesis                         | 43855  | 47810  | Metabolism; Metabolism of Terpenoids and Polyketides; Carotenoid biosynthesis                          |
| Cell cycle - Caulobacter                        | 162180 | 132310 | Cellular Processes; Cell Growth and Death; Cell cycle - Caulobacter                                    |
| Cell division                                   | 20708  | 18449  | Unclassified; Cellular Processes and Signaling; Cell division                                          |
| Cell motility and secretion                     | 73507  | 68411  | Unclassified; Cellular Processes and Signaling; Cell motility and secretion                            |
| Cellular antigens                               | 19049  | 17323  | Environmental Information Processing; Signaling Molecules and Interaction; Cellular antigens           |
| Chagas disease (American trypanosomiasis)       | 5472   | 2641   | Human Diseases; Infectious Diseases; Chagas disease (American trypanosomiasis)                         |
| Chaperones and folding catalysts                | 290948 | 275682 | Genetic Information Processing; Folding, Sorting and Degradation; Chaperones and folding catalysts     |
| Chloroalkane and chloroalkene degradation       | 66939  | 61879  | Metabolism; Xenobiotics Biodegradation and Metabolism; Chloroalkane and chloroalkene degradation       |
| Chlorocyclohexane and chlorobenzene degradation | 28978  | 25240  | Metabolism; Xenobiotics Biodegradation and Metabolism; Chlorocyclohexane and chlorobenzene degradation |
| Chromosome                                      | 396231 | 371779 | Genetic Information Processing; Replication and Repair; Chromosome                                     |
| Chronic myeloid leukemia                        | 2      | 1      | Human Diseases; Cancers; Chronic myeloid leukemia                                                      |
| Circadian rhythm - plant                        | 1841   | 887    | Organismal Systems; Environmental Adaptation; Circadian rhythm - plant                                 |
| Citrate cycle (TCA cycle)                       | 183081 | 140328 | Metabolism; Carbohydrate Metabolism; Citrate cycle (TCA cycle)                                         |

|                                                            |        |        |                                                                                                                   |
|------------------------------------------------------------|--------|--------|-------------------------------------------------------------------------------------------------------------------|
| Clavulanic acid biosynthesis                               | 23     | 48     | Metabolism; Biosynthesis of Other Secondary Metabolites; Clavulanic acid biosynthesis                             |
| Colorectal cancer                                          | 7322   | 2782   | Human Diseases; Cancers; Colorectal cancer                                                                        |
| Cyanoamino acid metabolism                                 | 63074  | 59639  | Metabolism; Metabolism of Other Amino Acids; Cyanoamino acid metabolism                                           |
| Cysteine and methionine metabolism                         | 195509 | 190500 | Metabolism; Amino Acid Metabolism; Cysteine and methionine metabolism                                             |
| Cytochrome P450                                            | 400    | 64     | Metabolism; Enzyme Families; Cytochrome P450                                                                      |
| Cytokine receptors                                         | 0      | 1      | Environmental Information Processing; Signaling Molecules and Interaction; Cytokine receptors                     |
| Cytokine-cytokine receptor interaction                     | 0      | 1      | Environmental Information Processing; Signaling Molecules and Interaction; Cytokine-cytokine receptor interaction |
| Cytoskeleton proteins                                      | 87410  | 80737  | Cellular Processes; Cell Motility; Cytoskeleton proteins                                                          |
| D-Alanine metabolism                                       | 18794  | 18316  | Metabolism; Metabolism of Other Amino Acids; D-Alanine metabolism                                                 |
| D-Arginine and D-ornithine metabolism                      | 617    | 389    | Metabolism; Metabolism of Other Amino Acids; D-Arginine and D-ornithine metabolism                                |
| D-Glutamine and D-glutamate metabolism                     | 35762  | 33043  | Metabolism; Metabolism of Other Amino Acids; D-Glutamine and D-glutamate metabolism                               |
| DNA repair and recombination proteins                      | 692121 | 629127 | Genetic Information Processing; Replication and Repair; DNA repair and recombination proteins                     |
| DNA replication                                            | 145530 | 122119 | Genetic Information Processing; Replication and Repair; DNA replication                                           |
| DNA replication proteins                                   | 262774 | 226574 | Genetic Information Processing; Replication and Repair; DNA replication proteins                                  |
| Dioxin degradation                                         | 22419  | 18175  | Metabolism; Xenobiotics Biodegradation and Metabolism; Dioxin degradation                                         |
| Drug metabolism - cytochrome P450                          | 71891  | 65630  | Metabolism; Xenobiotics Biodegradation and Metabolism; Drug metabolism - cytochrome P450                          |
| Drug metabolism - other enzymes                            | 39881  | 36227  | Metabolism; Xenobiotics Biodegradation and Metabolism; Drug metabolism - other enzymes                            |
| ECM-receptor interaction                                   | 1      | 0      | Environmental Information Processing; Signaling Molecules and Interaction; ECM-receptor interaction               |
| Electron transfer carriers                                 | 8575   | 10259  | Unclassified; Cellular Processes and Signaling; Electron transfer carriers                                        |
| Endocytosis                                                | 43     | 30     | Cellular Processes; Transport and Catabolism; Endocytosis                                                         |
| Energy metabolism                                          | 172951 | 156130 | Unclassified; Metabolism; Energy metabolism                                                                       |
| Epithelial cell signaling in Helicobacter pylori infection | 13213  | 14744  | Human Diseases; Infectious Diseases; Epithelial cell signaling in Helicobacter pylori infection                   |
| Ether lipid metabolism                                     | 793    | 943    | Metabolism; Lipid Metabolism; Ether lipid metabolism                                                              |
| Ethylbenzene degradation                                   | 15100  | 12370  | Metabolism; Xenobiotics Biodegradation and Metabolism; Ethylbenzene degradation                                   |
| Fatty acid biosynthesis                                    | 129976 | 117563 | Metabolism; Lipid Metabolism; Fatty acid biosynthesis                                                             |
| Fatty acid elongation in mitochondria                      | 3      | 1      | Metabolism; Lipid Metabolism; Fatty acid elongation in mitochondria                                               |
| Fatty acid metabolism                                      | 152533 | 131077 | Metabolism; Lipid Metabolism; Fatty acid metabolism                                                               |
| Fc gamma R-mediated phagocytosis                           | 43     | 30     | Organismal Systems; Immune System; Fc gamma R-mediated phagocytosis                                               |
| Flagellar assembly                                         | 93348  | 59621  | Cellular Processes; Cell Motility; Flagellar assembly                                                             |
| Flavone and flavonol biosynthesis                          | 63     | 48     | Metabolism; Biosynthesis of Other Secondary Metabolites; Flavone and flavonol biosynthesis                        |
| Flavonoid biosynthesis                                     | 16066  | 18074  | Metabolism; Biosynthesis of Other Secondary Metabolites; Flavonoid biosynthesis                                   |
| Fluorobenzoate degradation                                 | 20873  | 17119  | Metabolism; Xenobiotics Biodegradation and Metabolism; Fluorobenzoate degradation                                 |
| Focal adhesion                                             | 1      | 0      | Cellular Processes; Cell Communication; Focal adhesion                                                            |
| Folate biosynthesis                                        | 117372 | 114805 | Metabolism; Metabolism of Cofactors and Vitamins; Folate biosynthesis                                             |
| Fructose and mannose metabolism                            | 164812 | 171876 | Metabolism; Carbohydrate Metabolism; Fructose and mannose metabolism                                              |
| Function unknown                                           | 402812 | 383841 | Unclassified; Poorly Characterized; Function unknown                                                              |

|                                                            |        |        |                                                                                                            |
|------------------------------------------------------------|--------|--------|------------------------------------------------------------------------------------------------------------|
| G protein-coupled receptors                                | 15     | 12     | Environmental Information Processing; Signaling Molecules and Interaction; G protein-coupled receptors     |
| Galactose metabolism                                       | 87133  | 84438  | Metabolism; Carbohydrate Metabolism; Galactose metabolism                                                  |
| General function prediction only                           | 951042 | 935793 | Unclassified; Poorly Characterized; General function prediction only                                       |
| Geraniol degradation                                       | 52264  | 42014  | Metabolism; Metabolism of Terpenoids and Polyketides; Geraniol degradation                                 |
| Germination                                                | 1269   | 977    | Unclassified; Cellular Processes and Signaling; Germination                                                |
| Glutamatergic synapse                                      | 24372  | 23858  | Organismal Systems; Nervous System; Glutamatergic synapse                                                  |
| Glutathione metabolism                                     | 144657 | 131061 | Metabolism; Metabolism of Other Amino Acids; Glutathione metabolism                                        |
| Glycan biosynthesis and metabolism                         | 17335  | 18311  | Unclassified; Metabolism; Glycan biosynthesis and metabolism                                               |
| Glycerolipid metabolism                                    | 83021  | 83602  | Metabolism; Lipid Metabolism; Glycerolipid metabolism                                                      |
| Glycerophospholipid metabolism                             | 125471 | 110153 | Metabolism; Lipid Metabolism; Glycerophospholipid metabolism                                               |
| Glycine, serine and threonine metabolism                   | 205820 | 182951 | Metabolism; Amino Acid Metabolism; Glycine, serine and threonine metabolism                                |
| Glycolysis / Gluconeogenesis                               | 286483 | 277910 | Metabolism; Carbohydrate Metabolism; Glycolysis / Gluconeogenesis                                          |
| Glycosaminoglycan degradation                              | 4258   | 2557   | Metabolism; Glycan Biosynthesis and Metabolism; Glycosaminoglycan degradation                              |
| Glycosphingolipid biosynthesis - ganglio series            | 2743   | 1820   | Metabolism; Glycan Biosynthesis and Metabolism; Glycosphingolipid biosynthesis - ganglio series            |
| Glycosphingolipid biosynthesis - globo series              | 4632   | 3320   | Metabolism; Glycan Biosynthesis and Metabolism; Glycosphingolipid biosynthesis - globo series              |
| Glycosphingolipid biosynthesis - lacto and neolacto series | 69     | 24     | Metabolism; Glycan Biosynthesis and Metabolism; Glycosphingolipid biosynthesis - lacto and neolacto series |
| Glycosyltransferases                                       | 126282 | 136960 | Metabolism; Glycan Biosynthesis and Metabolism; Glycosyltransferases                                       |
| Glyoxylate and dicarboxylate metabolism                    | 172170 | 146158 | Metabolism; Carbohydrate Metabolism; Glyoxylate and dicarboxylate metabolism                               |
| GnRH signaling pathway                                     | 43     | 30     | Organismal Systems; Endocrine System; GnRH signaling pathway                                               |
| Hematopoietic cell lineage                                 | 18     | 5      | Organismal Systems; Immune System; Hematopoietic cell lineage                                              |
| Histidine metabolism                                       | 121264 | 120294 | Metabolism; Amino Acid Metabolism; Histidine metabolism                                                    |
| Homologous recombination                                   | 209948 | 184868 | Genetic Information Processing; Replication and Repair; Homologous recombination                           |
| Huntington's disease                                       | 38916  | 25207  | Human Diseases; Neurodegenerative Diseases; Huntington's disease                                           |
| Hypertrophic cardiomyopathy (HCM)                          | 430    | 102    | Human Diseases; Cardiovascular Diseases; Hypertrophic cardiomyopathy (HCM)                                 |
| Indole alkaloid biosynthesis                               | 89     | 49     | Metabolism; Biosynthesis of Other Secondary Metabolites; Indole alkaloid biosynthesis                      |
| Influenza A                                                | 7323   | 2788   | Human Diseases; Infectious Diseases; Influenza A                                                           |
| Inorganic ion transport and metabolism                     | 65866  | 58334  | Unclassified; Cellular Processes and Signaling; Inorganic ion transport and metabolism                     |
| Inositol phosphate metabolism                              | 42404  | 34881  | Metabolism; Carbohydrate Metabolism; Inositol phosphate metabolism                                         |
| Insulin signaling pathway                                  | 32083  | 37884  | Organismal Systems; Endocrine System; Insulin signaling pathway                                            |
| Ion channels                                               | 7688   | 8267   | Environmental Information Processing; Signaling Molecules and Interaction; Ion channels                    |
| Isoflavonoid biosynthesis                                  | 19     | 15     | Metabolism; Biosynthesis of Other Secondary Metabolites; Isoflavonoid biosynthesis                         |
| Isoquinoline alkaloid biosynthesis                         | 13536  | 11505  | Metabolism; Biosynthesis of Other Secondary Metabolites; Isoquinoline alkaloid biosynthesis                |
| Leishmaniasis                                              | 2      | 1      | Human Diseases; Infectious Diseases; Leishmaniasis                                                         |
| Limonene and pinene degradation                            | 59095  | 47210  | Metabolism; Metabolism of Terpenoids and Polyketides; Limonene and pinene degradation                      |
| Linoleic acid metabolism                                   | 6771   | 4725   | Metabolism; Lipid Metabolism; Linoleic acid metabolism                                                     |

|                                                 |        |        |                                                                                                                    |
|-------------------------------------------------|--------|--------|--------------------------------------------------------------------------------------------------------------------|
| Lipid biosynthesis proteins                     | 188136 | 171072 | Metabolism; Lipid Metabolism; Lipid biosynthesis proteins                                                          |
| Lipid metabolism                                | 41899  | 42339  | Unclassified; Metabolism; Lipid metabolism                                                                         |
| Lipoic acid metabolism                          | 29811  | 29544  | Metabolism; Metabolism of Cofactors and Vitamins; Lipoic acid metabolism                                           |
| Lipopolysaccharide biosynthesis                 | 54674  | 62348  | Metabolism; Glycan Biosynthesis and Metabolism; Lipopolysaccharide biosynthesis                                    |
| Lipopolysaccharide biosynthesis proteins        | 72591  | 80689  | Metabolism; Glycan Biosynthesis and Metabolism; Lipopolysaccharide biosynthesis proteins                           |
| Lysine biosynthesis                             | 158531 | 138441 | Metabolism; Amino Acid Metabolism; Lysine biosynthesis                                                             |
| Lysine degradation                              | 83427  | 66072  | Metabolism; Amino Acid Metabolism; Lysine degradation                                                              |
| Lysosome                                        | 6053   | 3894   | Cellular Processes; Transport and Catabolism; Lysosome                                                             |
| MAPK signaling pathway - yeast                  | 10780  | 9357   | Environmental Information Processing; Signal Transduction; MAPK signaling pathway - yeast                          |
| Meiosis - yeast                                 | 22232  | 24613  | Cellular Processes; Cell Growth and Death; Meiosis - yeast                                                         |
| Melanogenesis                                   | 15     | 26     | Organismal Systems; Endocrine System; Melanogenesis                                                                |
| Membrane and intracellular structural molecules | 179219 | 158735 | Unclassified; Cellular Processes and Signaling; Membrane and intracellular structural molecules                    |
| Metabolism of cofactors and vitamins            | 46511  | 45497  | Unclassified; Metabolism; Metabolism of cofactors and vitamins                                                     |
| Metabolism of xenobiotics by cytochrome P450    | 71415  | 65135  | Metabolism; Xenobiotics Biodegradation and Metabolism; Metabolism of xenobiotics by cytochrome P450                |
| Methane metabolism                              | 248182 | 244492 | Metabolism; Energy Metabolism; Methane metabolism                                                                  |
| Mineral absorption                              | 14719  | 17808  | Organismal Systems; Digestive System; Mineral absorption                                                           |
| Mismatch repair                                 | 188496 | 165419 | Genetic Information Processing; Replication and Repair; Mismatch repair                                            |
| N-Glycan biosynthesis                           | 17134  | 19039  | Metabolism; Glycan Biosynthesis and Metabolism; N-Glycan biosynthesis                                              |
| NOD-like receptor signaling pathway             | 8270   | 7828   | Organismal Systems; Immune System; NOD-like receptor signaling pathway                                             |
| Naphthalene degradation                         | 51776  | 47715  | Metabolism; Xenobiotics Biodegradation and Metabolism; Naphthalene degradation                                     |
| Neuroactive ligand-receptor interaction         | 1      | 6      | Environmental Information Processing; Signaling Molecules and Interaction; Neuroactive ligand-receptor interaction |
| Nicotinate and nicotinamide metabolism          | 105143 | 103644 | Metabolism; Metabolism of Cofactors and Vitamins; Nicotinate and nicotinamide metabolism                           |
| Nitrogen metabolism                             | 164600 | 157962 | Metabolism; Energy Metabolism; Nitrogen metabolism                                                                 |
| Nitrotoluene degradation                        | 13763  | 12170  | Metabolism; Xenobiotics Biodegradation and Metabolism; Nitrotoluene degradation                                    |
| Non-homologous end-joining                      | 6539   | 4349   | Genetic Information Processing; Replication and Repair; Non-homologous end-joining                                 |
| Notch signaling pathway                         | 2      | 1      | Environmental Information Processing; Signal Transduction; Notch signaling pathway                                 |
| Novobiocin biosynthesis                         | 30423  | 27623  | Metabolism; Biosynthesis of Other Secondary Metabolites; Novobiocin biosynthesis                                   |
| Nucleotide excision repair                      | 82276  | 72431  | Genetic Information Processing; Replication and Repair; Nucleotide excision repair                                 |
| Nucleotide metabolism                           | 5659   | 6101   | Unclassified; Metabolism; Nucleotide metabolism                                                                    |
| One carbon pool by folate                       | 129143 | 114822 | Metabolism; Metabolism of Cofactors and Vitamins; One carbon pool by folate                                        |
| Other glycan degradation                        | 17795  | 13911  | Metabolism; Glycan Biosynthesis and Metabolism; Other glycan degradation                                           |
| Other ion-coupled transporters                  | 272268 | 257850 | Unclassified; Cellular Processes and Signaling; Other ion-coupled transporters                                     |
| Other transporters                              | 72195  | 68939  | Unclassified; Cellular Processes and Signaling; Other transporters                                                 |
| Others                                          | 302436 | 310513 | Unclassified; Metabolism; Others                                                                                   |
| Oxidative phosphorylation                       | 434504 | 372767 | Metabolism; Energy Metabolism; Oxidative phosphorylation                                                           |
| PPAR signaling pathway                          | 44272  | 41981  | Organismal Systems; Endocrine System; PPAR signaling pathway                                                       |

|                                                     |        |        |                                                                                                    |
|-----------------------------------------------------|--------|--------|----------------------------------------------------------------------------------------------------|
| Pancreatic secretion                                | 1      | 6      | Organismal Systems; Digestive System; Pancreatic secretion                                         |
| Pantothenate and CoA biosynthesis                   | 148700 | 145692 | Metabolism; Metabolism of Cofactors and Vitamins; Pantothenate and CoA biosynthesis                |
| Parkinson's disease                                 | 20509  | 8591   | Human Diseases; Neurodegenerative Diseases; Parkinson's disease                                    |
| Pathogenic Escherichia coli infection               | 110    | 40     | Human Diseases; Infectious Diseases; Pathogenic Escherichia coli infection                         |
| Pathways in cancer                                  | 25620  | 19289  | Human Diseases; Cancers; Pathways in cancer                                                        |
| Penicillin and cephalosporin biosynthesis           | 10397  | 9938   | Metabolism; Biosynthesis of Other Secondary Metabolites; Penicillin and cephalosporin biosynthesis |
| Pentose and glucuronate interconversions            | 84788  | 80204  | Metabolism; Carbohydrate Metabolism; Pentose and glucuronate interconversions                      |
| Pentose phosphate pathway                           | 192684 | 194832 | Metabolism; Carbohydrate Metabolism; Pentose phosphate pathway                                     |
| Peptidases                                          | 481219 | 485869 | Metabolism; Enzyme Families; Peptidases                                                            |
| Peptidoglycan biosynthesis                          | 181227 | 164775 | Metabolism; Glycan Biosynthesis and Metabolism; Peptidoglycan biosynthesis                         |
| Peroxisome                                          | 63703  | 56107  | Cellular Processes; Transport and Catabolism; Peroxisome                                           |
| Pertussis                                           | 14438  | 15908  | Human Diseases; Infectious Diseases; Pertussis                                                     |
| Phenylalanine metabolism                            | 82779  | 67016  | Metabolism; Amino Acid Metabolism; Phenylalanine metabolism                                        |
| Phenylalanine, tyrosine and tryptophan biosynthesis | 172279 | 170403 | Metabolism; Amino Acid Metabolism; Phenylalanine, tyrosine and tryptophan biosynthesis             |
| Phenylpropanoid biosynthesis                        | 32495  | 32179  | Metabolism; Biosynthesis of Other Secondary Metabolites; Phenylpropanoid biosynthesis              |
| Phosphatidylinositol signaling system               | 33016  | 31348  | Environmental Information Processing; Signal Transduction; Phosphatidylinositol signaling system   |
| Phosphonate and phosphinate metabolism              | 8463   | 5549   | Metabolism; Metabolism of Other Amino Acids; Phosphonate and phosphinate metabolism                |
| Phosphotransferase system (PTS)                     | 40933  | 42030  | Environmental Information Processing; Membrane Transport; Phosphotransferase system (PTS)          |
| Photosynthesis                                      | 347467 | 399733 | Metabolism; Energy Metabolism; Photosynthesis                                                      |
| Photosynthesis - antenna proteins                   | 75448  | 94795  | Metabolism; Energy Metabolism; Photosynthesis - antenna proteins                                   |
| Photosynthesis proteins                             | 431529 | 502186 | Metabolism; Energy Metabolism; Photosynthesis proteins                                             |
| Plant-pathogen interaction                          | 27376  | 22728  | Organismal Systems; Environmental Adaptation; Plant-pathogen interaction                           |
| Polycyclic aromatic hydrocarbon degradation         | 32623  | 31446  | Metabolism; Xenobiotics Biodegradation and Metabolism; Polycyclic aromatic hydrocarbon degradation |
| Polyketide sugar unit biosynthesis                  | 45370  | 48483  | Metabolism; Metabolism of Terpenoids and Polyketides; Polyketide sugar unit biosynthesis           |
| Pores ion channels                                  | 168202 | 163600 | Unclassified; Cellular Processes and Signaling; Pores ion channels                                 |
| Porphyrin and chlorophyll metabolism                | 401803 | 411543 | Metabolism; Metabolism of Cofactors and Vitamins; Porphyrin and chlorophyll metabolism             |
| Prenyltransferases                                  | 117025 | 116055 | Metabolism; Metabolism of Terpenoids and Polyketides; Prenyltransferases                           |
| Primary bile acid biosynthesis                      | 1752   | 1179   | Metabolism; Lipid Metabolism; Primary bile acid biosynthesis                                       |
| Primary immunodeficiency                            | 9788   | 9609   | Human Diseases; Immune System Diseases; Primary immunodeficiency                                   |
| Prion diseases                                      | 2415   | 1392   | Human Diseases; Neurodegenerative Diseases; Prion diseases                                         |
| Progesterone-mediated oocyte maturation             | 8263   | 7823   | Organismal Systems; Endocrine System; Progesterone-mediated oocyte maturation                      |
| Propanoate metabolism                               | 174537 | 141554 | Metabolism; Carbohydrate Metabolism; Propanoate metabolism                                         |
| Prostate cancer                                     | 8265   | 7825   | Human Diseases; Cancers; Prostate cancer                                                           |
| Proteasome                                          | 8964   | 8502   | Genetic Information Processing; Folding, Sorting and Degradation; Proteasome                       |
| Protein digestion and absorption                    | 1394   | 697    | Organismal Systems; Digestive System; Protein digestion and absorption                             |
| Protein export                                      | 158319 | 135281 | Genetic Information Processing; Folding, Sorting and Degradation; Protein export                   |

|                                                       |        |        |                                                                                                                |
|-------------------------------------------------------|--------|--------|----------------------------------------------------------------------------------------------------------------|
| Protein folding and associated processing             | 237174 | 236150 | Unclassified; Genetic Information Processing; Protein folding and associated processing                        |
| Protein kinases                                       | 142290 | 155333 | Metabolism; Enzyme Families; Protein kinases                                                                   |
| Protein processing in endoplasmic reticulum           | 24794  | 26557  | Genetic Information Processing; Folding, Sorting and Degradation; Protein processing in endoplasmic reticulum  |
| Proximal tubule bicarbonate reclamation               | 7384   | 8118   | Organismal Systems; Excretory System; Proximal tubule bicarbonate reclamation                                  |
| Purine metabolism                                     | 536136 | 499884 | Metabolism; Nucleotide Metabolism; Purine metabolism                                                           |
| Pyrimidine metabolism                                 | 367614 | 330371 | Metabolism; Nucleotide Metabolism; Pyrimidine metabolism                                                       |
| Pyruvate metabolism                                   | 289433 | 270586 | Metabolism; Carbohydrate Metabolism; Pyruvate metabolism                                                       |
| RIG-I-like receptor signaling pathway                 | 670    | 795    | Organismal Systems; Immune System; RIG-I-like receptor signaling pathway                                       |
| RNA degradation                                       | 142790 | 138098 | Genetic Information Processing; Folding, Sorting and Degradation; RNA degradation                              |
| RNA polymerase                                        | 45147  | 40516  | Genetic Information Processing; Transcription; RNA polymerase                                                  |
| RNA transport                                         | 18147  | 21758  | Genetic Information Processing; Translation; RNA transport                                                     |
| Renal cell carcinoma                                  | 10031  | 8682   | Human Diseases; Cancers; Renal cell carcinoma                                                                  |
| Renin-angiotensin system                              | 662    | 359    | Organismal Systems; Endocrine System; Renin-angiotensin system                                                 |
| Replication, recombination and repair proteins        | 228823 | 232657 | Unclassified; Genetic Information Processing; Replication, recombination and repair proteins                   |
| Restriction enzyme                                    | 25303  | 29140  | Unclassified; Genetic Information Processing; Restriction enzyme                                               |
| Retinol metabolism                                    | 30092  | 30355  | Metabolism; Metabolism of Cofactors and Vitamins; Retinol metabolism                                           |
| Riboflavin metabolism                                 | 82678  | 80536  | Metabolism; Metabolism of Cofactors and Vitamins; Riboflavin metabolism                                        |
| Ribosome                                              | 551217 | 476326 | Genetic Information Processing; Translation; Ribosome                                                          |
| Ribosome Biogenesis                                   | 303239 | 277490 | Genetic Information Processing; Translation; Ribosome Biogenesis                                               |
| Ribosome biogenesis in eukaryotes                     | 11629  | 10377  | Genetic Information Processing; Translation; Ribosome biogenesis in eukaryotes                                 |
| Secondary bile acid biosynthesis                      | 424    | 311    | Metabolism; Lipid Metabolism; Secondary bile acid biosynthesis                                                 |
| Secretion system                                      | 492930 | 425147 | Environmental Information Processing; Membrane Transport; Secretion system                                     |
| Selenocompound metabolism                             | 88917  | 82130  | Metabolism; Metabolism of Other Amino Acids; Selenocompound metabolism                                         |
| Sesquiterpenoid biosynthesis                          | 5      | 15     | Metabolism; Metabolism of Terpenoids and Polyketides; Sesquiterpenoid biosynthesis                             |
| Shigellosis                                           | 91     | 26     | Human Diseases; Infectious Diseases; Shigellosis                                                               |
| Signal transduction mechanisms                        | 142990 | 147751 | Unclassified; Cellular Processes and Signaling; Signal transduction mechanisms                                 |
| Small cell lung cancer                                | 7324   | 2783   | Human Diseases; Cancers; Small cell lung cancer                                                                |
| Sphingolipid metabolism                               | 13952  | 11201  | Metabolism; Lipid Metabolism; Sphingolipid metabolism                                                          |
| Sporulation                                           | 17895  | 16181  | Unclassified; Cellular Processes and Signaling; Sporulation                                                    |
| Staphylococcus aureus infection                       | 2168   | 999    | Human Diseases; Infectious Diseases; Staphylococcus aureus infection                                           |
| Starch and sucrose metabolism                         | 193195 | 202649 | Metabolism; Carbohydrate Metabolism; Starch and sucrose metabolism                                             |
| Steroid biosynthesis                                  | 9918   | 11736  | Metabolism; Lipid Metabolism; Steroid biosynthesis                                                             |
| Steroid hormone biosynthesis                          | 8688   | 7652   | Metabolism; Lipid Metabolism; Steroid hormone biosynthesis                                                     |
| Stilbenoid, diarylheptanoid and gingerol biosynthesis | 12084  | 12857  | Metabolism; Biosynthesis of Other Secondary Metabolites; Stilbenoid, diarylheptanoid and gingerol biosynthesis |
| Streptomycin biosynthesis                             | 85392  | 87414  | Metabolism; Biosynthesis of Other Secondary Metabolites; Streptomycin biosynthesis                             |
| Styrene degradation                                   | 22341  | 15352  | Metabolism; Xenobiotics Biodegradation and Metabolism; Styrene degradation                                     |
| Sulfur metabolism                                     | 85484  | 83627  | Metabolism; Energy Metabolism; Sulfur metabolism                                                               |



|                                                        |         |         |                                                                                                                 |
|--------------------------------------------------------|---------|---------|-----------------------------------------------------------------------------------------------------------------|
| Sulfur relay system                                    | 99072   | 102952  | Genetic Information Processing; Folding, Sorting and Degradation; Sulfur relay system                           |
| Synthesis and degradation of ketone bodies             | 21597   | 13290   | Metabolism; Lipid Metabolism; Synthesis and degradation of ketone bodies                                        |
| Systemic lupus erythematosus                           | 38      | 53      | Human Diseases; Immune System Diseases; Systemic lupus erythematosus                                            |
| Taurine and hypotaurine metabolism                     | 30265   | 27589   | Metabolism; Metabolism of Other Amino Acids; Taurine and hypotaurine metabolism                                 |
| Terpenoid backbone biosynthesis                        | 131995  | 128387  | Metabolism; Metabolism of Terpenoids and Polyketides; Terpenoid backbone biosynthesis                           |
| Tetracycline biosynthesis                              | 37687   | 37838   | Metabolism; Metabolism of Terpenoids and Polyketides; Tetracycline biosynthesis                                 |
| Thiamine metabolism                                    | 97560   | 95908   | Metabolism; Metabolism of Cofactors and Vitamins; Thiamine metabolism                                           |
| Toluene degradation                                    | 54172   | 44615   | Metabolism; Xenobiotics Biodegradation and Metabolism; Toluene degradation                                      |
| Toxoplasmosis                                          | 7323    | 2782    | Human Diseases; Infectious Diseases; Toxoplasmosis                                                              |
| Transcription factors                                  | 310199  | 293563  | Genetic Information Processing; Transcription; Transcription factors                                            |
| Transcription machinery                                | 196916  | 175360  | Genetic Information Processing; Transcription; Transcription machinery                                          |
| Transcription related proteins                         | 1512    | 1611    | Unclassified; Genetic Information Processing; Transcription related proteins                                    |
| Translation factors                                    | 122577  | 109956  | Genetic Information Processing; Translation; Translation factors                                                |
| Translation proteins                                   | 217651  | 207481  | Unclassified; Genetic Information Processing; Translation proteins                                              |
| Transporters                                           | 1394356 | 1453129 | Environmental Information Processing; Membrane Transport; Transporters                                          |
| Tropane, piperidine and pyridine alkaloid biosynthesis | 30345   | 28282   | Metabolism; Biosynthesis of Other Secondary Metabolites; Tropane, piperidine and pyridine alkaloid biosynthesis |
| Tryptophan metabolism                                  | 110001  | 88400   | Metabolism; Amino Acid Metabolism; Tryptophan metabolism                                                        |
| Tuberculosis                                           | 72339   | 73795   | Human Diseases; Infectious Diseases; Tuberculosis                                                               |
| Two-component system                                   | 558228  | 538181  | Environmental Information Processing; Signal Transduction; Two-component system                                 |
| Type I diabetes mellitus                               | 15408   | 14945   | Human Diseases; Metabolic Diseases; Type I diabetes mellitus                                                    |
| Type II diabetes mellitus                              | 17429   | 19735   | Human Diseases; Metabolic Diseases; Type II diabetes mellitus                                                   |
| Tyrosine metabolism                                    | 112956  | 108059  | Metabolism; Amino Acid Metabolism; Tyrosine metabolism                                                          |
| Ubiquinone and other terpenoid-quinone biosynthesis    | 147041  | 148142  | Metabolism; Metabolism of Cofactors and Vitamins; Ubiquinone and other terpenoid-quinone biosynthesis           |
| Ubiquitin system                                       | 5690    | 6969    | Genetic Information Processing; Folding, Sorting and Degradation; Ubiquitin system                              |
| VEGF signaling pathway                                 | 2       | 1       | Environmental Information Processing; Signal Transduction; VEGF signaling pathway                               |
| Valine, leucine and isoleucine biosynthesis            | 190332  | 178026  | Metabolism; Amino Acid Metabolism; Valine, leucine and isoleucine biosynthesis                                  |
| Valine, leucine and isoleucine degradation             | 164851  | 122760  | Metabolism; Amino Acid Metabolism; Valine, leucine and isoleucine degradation                                   |
| Various types of N-glycan biosynthesis                 | 2       | 15      | Metabolism; Glycan Biosynthesis and Metabolism; Various types of N-glycan biosynthesis                          |
| Vasopressin-regulated water reabsorption               | 1       | 3       | Organismal Systems; Excretory System; Vasopressin-regulated water reabsorption                                  |
| Vibrio cholerae infection                              | 100     | 184     | Human Diseases; Infectious Diseases; Vibrio cholerae infection                                                  |
| Vibrio cholerae pathogenic cycle                       | 33025   | 36449   | Human Diseases; Infectious Diseases; Vibrio cholerae pathogenic cycle                                           |
| Viral myocarditis                                      | 7322    | 2782    | Human Diseases; Cardiovascular Diseases; Viral myocarditis                                                      |
| Vitamin B6 metabolism                                  | 43697   | 43380   | Metabolism; Metabolism of Cofactors and Vitamins; Vitamin B6 metabolism                                         |
| Wnt signaling pathway                                  | 2       | 1       | Environmental Information Processing; Signal Transduction; Wnt signaling pathway                                |
| Xylene degradation                                     | 19580   | 16081   | Metabolism; Xenobiotics Biodegradation and Metabolism; Xylene degradation                                       |
| Zeatin biosynthesis                                    | 10226   | 8755    | Metabolism; Metabolism of Terpenoids and Polyketides; Zeatin biosynthesis                                       |

|                                 |       |       |                                                                                 |
|---------------------------------|-------|-------|---------------------------------------------------------------------------------|
| alpha-Linolenic acid metabolism | 9586  | 9834  | Metabolism; Lipid Metabolism; alpha-Linolenic acid metabolism                   |
| beta-Alanine metabolism         | 88952 | 79073 | Metabolism; Metabolism of Other Amino Acids; beta-Alanine metabolism            |
| beta-Lactam resistance          | 9277  | 8786  | Metabolism; Biosynthesis of Other Secondary Metabolites; beta-Lactam resistance |
| mRNA surveillance pathway       | 14    | 3     | Genetic Information Processing; Translation; mRNA surveillance pathway          |
| p53 signaling pathway           | 7358  | 2808  | Cellular Processes; Cell Growth and Death; p53 signaling pathway                |

Table S3 Results of PICRUSt at level 3 KEGG Orthology using the V4-V5 amplification regions

| OTU ID                                                          | A1(V4V5) | B1(V4V5) | KEGG Pathways                                                                                                          |
|-----------------------------------------------------------------|----------|----------|------------------------------------------------------------------------------------------------------------------------|
| 1,1,1-Trichloro-2,2-bis(4-chlorophenyl)ethane (DDT) degradation | 99       | 90       | Metabolism; Xenobiotics Biodegradation and Metabolism; 1,1,1-Trichloro-2,2-bis(4-chlorophenyl)ethane (DDT) degradation |
| ABC transporters                                                | 1532954  | 1614032  | Environmental Information Processing; Membrane Transport; ABC transporters                                             |
| Adherens junction                                               | 1        | 0        | Cellular Processes; Cell Communication; Adherens junction                                                              |
| Adipocytokine signaling pathway                                 | 30954    | 32807    | Organismal Systems; Endocrine System; Adipocytokine signaling pathway                                                  |
| African trypanosomiasis                                         | 4760     | 6159     | Human Diseases; Infectious Diseases; African trypanosomiasis                                                           |
| Alanine, aspartate and glutamate metabolism                     | 382785   | 408174   | Metabolism; Amino Acid Metabolism; Alanine, aspartate and glutamate metabolism                                         |
| Aldosterone-regulated sodium reabsorption                       | 7        | 3        | Organismal Systems; Excretory System; Aldosterone-regulated sodium reabsorption                                        |
| Alzheimer's disease                                             | 35441    | 41569    | Human Diseases; Neurodegenerative Diseases; Alzheimer's disease                                                        |
| Amino acid metabolism                                           | 128081   | 129484   | Unclassified; Metabolism; Amino acid metabolism                                                                        |
| Amino acid related enzymes                                      | 560405   | 597026   | Metabolism; Amino Acid Metabolism; Amino acid related enzymes                                                          |
| Amino sugar and nucleotide sugar metabolism                     | 499939   | 521219   | Metabolism; Carbohydrate Metabolism; Amino sugar and nucleotide sugar metabolism                                       |
| Aminoacyl-tRNA biosynthesis                                     | 493082   | 512337   | Genetic Information Processing; Translation; Aminoacyl-tRNA biosynthesis                                               |
| Aminobenzoate degradation                                       | 111788   | 132106   | Metabolism; Xenobiotics Biodegradation and Metabolism; Aminobenzoate degradation                                       |
| Amoebiasis                                                      | 13069    | 12649    | Human Diseases; Infectious Diseases; Amoebiasis                                                                        |
| Amyotrophic lateral sclerosis (ALS)                             | 9667     | 15022    | Human Diseases; Neurodegenerative Diseases; Amyotrophic lateral sclerosis (ALS)                                        |
| Antigen processing and presentation                             | 15963    | 16020    | Organismal Systems; Immune System; Antigen processing and presentation                                                 |
| Apoptosis                                                       | 5684     | 7710     | Cellular Processes; Cell Growth and Death; Apoptosis                                                                   |
| Arachidonic acid metabolism                                     | 31512    | 34818    | Metabolism; Lipid Metabolism; Arachidonic acid metabolism                                                              |
| Arginine and proline metabolism                                 | 573772   | 605515   | Metabolism; Amino Acid Metabolism; Arginine and proline metabolism                                                     |
| Arrhythmogenic right ventricular cardiomyopathy (ARVC)          | 1        | 0        | Human Diseases; Cardiovascular Diseases; Arrhythmogenic right ventricular cardiomyopathy (ARVC)                        |
| Ascorbate and aldarate metabolism                               | 53591    | 63226    | Metabolism; Carbohydrate Metabolism; Ascorbate and aldarate metabolism                                                 |
| Atrazine degradation                                            | 41229    | 40986    | Metabolism; Xenobiotics Biodegradation and Metabolism; Atrazine degradation                                            |
| Bacterial chemotaxis                                            | 96359    | 142687   | Cellular Processes; Cell Motility; Bacterial chemotaxis                                                                |
| Bacterial invasion of epithelial cells                          | 12316    | 11754    | Human Diseases; Infectious Diseases; Bacterial invasion of epithelial cells                                            |
| Bacterial motility proteins                                     | 542976   | 635444   | Cellular Processes; Cell Motility; Bacterial motility proteins                                                         |
| Bacterial secretion system                                      | 285842   | 329025   | Environmental Information Processing; Membrane Transport; Bacterial secretion system                                   |
| Bacterial toxins                                                | 30796    | 33408    | Environmental Information Processing; Signaling Molecules and Interaction; Bacterial toxins                            |
| Basal transcription factors                                     | 427      | 672      | Genetic Information Processing; Transcription; Basal transcription factors                                             |
| Base excision repair                                            | 173734   | 188027   | Genetic Information Processing; Replication and Repair; Base excision repair                                           |
| Benzoate degradation                                            | 101475   | 131952   | Metabolism; Xenobiotics Biodegradation and Metabolism; Benzoate degradation                                            |
| Betalain biosynthesis                                           | 94       | 297      | Metabolism; Biosynthesis of Other Secondary Metabolites; Betalain biosynthesis                                         |
| Bile secretion                                                  | 236      | 441      | Organismal Systems; Digestive System; Bile secretion                                                                   |
| Biosynthesis and biodegradation of secondary metabolites        | 32143    | 36392    | Unclassified; Metabolism; Biosynthesis and biodegradation of secondary metabolites                                     |
| Biosynthesis of 12-, 14- and 16-membered macrolides             | 15       | 21       | Metabolism; Metabolism of Terpenoids and Polyketides; Biosynthesis of 12-, 14- and 16-                                 |

|                                                         |        |        |                                                                                                               |
|---------------------------------------------------------|--------|--------|---------------------------------------------------------------------------------------------------------------|
|                                                         |        |        | membered macrolides                                                                                           |
| Biosynthesis of ansamycins                              | 16947  | 19272  | Metabolism; Metabolism of Terpenoids and Polyketides; Biosynthesis of ansamycins                              |
| Biosynthesis of siderophore group nonribosomal peptides | 17390  | 21118  | Metabolism; Metabolism of Terpenoids and Polyketides; Biosynthesis of siderophore group nonribosomal peptides |
| Biosynthesis of type II polyketide backbone             | 49     | 40     | Metabolism; Metabolism of Terpenoids and Polyketides; Biosynthesis of type II polyketide backbone             |
| Biosynthesis of type II polyketide products             | 69     | 154    | Metabolism; Metabolism of Terpenoids and Polyketides; Biosynthesis of type II polyketide products             |
| Biosynthesis of unsaturated fatty acids                 | 97986  | 109450 | Metabolism; Lipid Metabolism; Biosynthesis of unsaturated fatty acids                                         |
| Biosynthesis of vancomycin group antibiotics            | 27800  | 28079  | Metabolism; Metabolism of Terpenoids and Polyketides; Biosynthesis of vancomycin group antibiotics            |
| Biotin metabolism                                       | 73925  | 77500  | Metabolism; Metabolism of Cofactors and Vitamins; Biotin metabolism                                           |
| Bisphenol degradation                                   | 21693  | 26936  | Metabolism; Xenobiotics Biodegradation and Metabolism; Bisphenol degradation                                  |
| Bladder cancer                                          | 1124   | 2007   | Human Diseases; Cancers; Bladder cancer                                                                       |
| Butanoate metabolism                                    | 255051 | 309712 | Metabolism; Carbohydrate Metabolism; Butanoate metabolism                                                     |
| Butirosin and neomycin biosynthesis                     | 27341  | 27057  | Metabolism; Biosynthesis of Other Secondary Metabolites; Butirosin and neomycin biosynthesis                  |
| C5-Branched dibasic acid metabolism                     | 114030 | 125446 | Metabolism; Carbohydrate Metabolism; C5-Branched dibasic acid metabolism                                      |
| Caffeine metabolism                                     | 385    | 574    | Metabolism; Biosynthesis of Other Secondary Metabolites; Caffeine metabolism                                  |
| Calcium signaling pathway                               | 12081  | 10911  | Environmental Information Processing; Signal Transduction; Calcium signaling pathway                          |
| Caprolactam degradation                                 | 36806  | 52758  | Metabolism; Xenobiotics Biodegradation and Metabolism; Caprolactam degradation                                |
| Carbohydrate digestion and absorption                   | 12851  | 12303  | Organismal Systems; Digestive System; Carbohydrate digestion and absorption                                   |
| Carbohydrate metabolism                                 | 109798 | 109195 | Unclassified; Metabolism; Carbohydrate metabolism                                                             |
| Carbon fixation in photosynthetic organisms             | 322525 | 325851 | Metabolism; Energy Metabolism; Carbon fixation in photosynthetic organisms                                    |
| Carbon fixation pathways in prokaryotes                 | 362069 | 403031 | Metabolism; Energy Metabolism; Carbon fixation pathways in prokaryotes                                        |
| Cardiac muscle contraction                              | 11852  | 14842  | Organismal Systems; Circulatory System; Cardiac muscle contraction                                            |
| Carotenoid biosynthesis                                 | 101778 | 96282  | Metabolism; Metabolism of Terpenoids and Polyketides; Carotenoid biosynthesis                                 |
| Cell cycle                                              | 2      | 14     | Cellular Processes; Cell Growth and Death; Cell cycle                                                         |
| Cell cycle - Caulobacter                                | 259265 | 272113 | Cellular Processes; Cell Growth and Death; Cell cycle - Caulobacter                                           |
| Cell division                                           | 32979  | 36255  | Unclassified; Cellular Processes and Signaling; Cell division                                                 |
| Cell motility and secretion                             | 126034 | 133585 | Unclassified; Cellular Processes and Signaling; Cell motility and secretion                                   |
| Cellular antigens                                       | 31180  | 33796  | Environmental Information Processing; Signaling Molecules and Interaction; Cellular antigens                  |
| Chagas disease (American trypanosomiasis)               | 4554   | 5839   | Human Diseases; Infectious Diseases; Chagas disease (American trypanosomiasis)                                |
| Chaperones and folding catalysts                        | 516036 | 540512 | Genetic Information Processing; Folding, Sorting and Degradation; Chaperones and folding catalysts            |
| Chloroalkane and chloroalkene degradation               | 108803 | 118155 | Metabolism; Xenobiotics Biodegradation and Metabolism; Chloroalkane and chloroalkene degradation              |
| Chlorocyclohexane and chlorobenzene degradation         | 46206  | 49629  | Metabolism; Xenobiotics Biodegradation and Metabolism; Chlorocyclohexane and chlorobenzene degradation        |
| Chromosome                                              | 698375 | 731287 | Genetic Information Processing; Replication and Repair; Chromosome                                            |
| Chronic myeloid leukemia                                | 0      | 1      | Human Diseases; Cancers; Chronic myeloid leukemia                                                             |
| Circadian rhythm - plant                                | 1134   | 1814   | Organismal Systems; Environmental                                                                             |

|                                                            |         |         |                                                                                                                   |
|------------------------------------------------------------|---------|---------|-------------------------------------------------------------------------------------------------------------------|
|                                                            |         |         | Adaptation; Circadian rhythm - plant                                                                              |
| Citrate cycle (TCA cycle)                                  | 245867  | 280071  | Metabolism; Carbohydrate Metabolism; Citrate cycle (TCA cycle)                                                    |
| Clavulanic acid biosynthesis                               | 96      | 36      | Metabolism; Biosynthesis of Other Secondary Metabolites; Clavulanic acid biosynthesis                             |
| Colorectal cancer                                          | 5487    | 7226    | Human Diseases; Cancers; Colorectal cancer                                                                        |
| Cyanoamino acid metabolism                                 | 107593  | 114338  | Metabolism; Metabolism of Other Amino Acids; Cyanoamino acid metabolism                                           |
| Cysteine and methionine metabolism                         | 330893  | 357210  | Metabolism; Amino Acid Metabolism; Cysteine and methionine metabolism                                             |
| Cytochrome P450                                            | 135     | 176     | Metabolism; Enzyme Families; Cytochrome P450                                                                      |
| Cytokine receptors                                         | 4       | 2       | Environmental Information Processing; Signaling Molecules and Interaction; Cytokine receptors                     |
| Cytokine-cytokine receptor interaction                     | 4       | 2       | Environmental Information Processing; Signaling Molecules and Interaction; Cytokine-cytokine receptor interaction |
| Cytoskeleton proteins                                      | 162136  | 163234  | Cellular Processes; Cell Motility; Cytoskeleton proteins                                                          |
| D-Alanine metabolism                                       | 31448   | 34837   | Metabolism; Metabolism of Other Amino Acids; D-Alanine metabolism                                                 |
| D-Arginine and D-ornithine metabolism                      | 633     | 994     | Metabolism; Metabolism of Other Amino Acids; D-Arginine and D-ornithine metabolism                                |
| D-Glutamine and D-glutamate metabolism                     | 63094   | 65869   | Metabolism; Metabolism of Other Amino Acids; D-Glutamine and D-glutamate metabolism                               |
| DNA repair and recombination proteins                      | 1182132 | 1243385 | Genetic Information Processing; Replication and Repair; DNA repair and recombination proteins                     |
| DNA replication                                            | 233192  | 248222  | Genetic Information Processing; Replication and Repair; DNA replication                                           |
| DNA replication proteins                                   | 431171  | 456314  | Genetic Information Processing; Replication and Repair; DNA replication proteins                                  |
| Dilated cardiomyopathy (DCM)                               | 1       | 0       | Human Diseases; Cardiovascular Diseases; Dilated cardiomyopathy (DCM)                                             |
| Dioxin degradation                                         | 31555   | 33848   | Metabolism; Xenobiotics Biodegradation and Metabolism; Dioxin degradation                                         |
| Drug metabolism - cytochrome P450                          | 121418  | 129405  | Metabolism; Xenobiotics Biodegradation and Metabolism; Drug metabolism - cytochrome P450                          |
| Drug metabolism - other enzymes                            | 55862   | 66221   | Metabolism; Xenobiotics Biodegradation and Metabolism; Drug metabolism - other enzymes                            |
| Electron transfer carriers                                 | 14958   | 16358   | Unclassified; Cellular Processes and Signaling; Electron transfer carriers                                        |
| Endocrine and other factor-regulated calcium reabsorption  | 1       | 0       | Organismal Systems; Excretory System; Endocrine and other factor-regulated calcium reabsorption                   |
| Endocytosis                                                | 37      | 91      | Cellular Processes; Transport and Catabolism; Endocytosis                                                         |
| Energy metabolism                                          | 259355  | 296283  | Unclassified; Metabolism; Energy metabolism                                                                       |
| Epithelial cell signaling in Helicobacter pylori infection | 26963   | 27590   | Human Diseases; Infectious Diseases; Epithelial cell signaling in Helicobacter pylori infection                   |
| Ether lipid metabolism                                     | 821     | 1627    | Metabolism; Lipid Metabolism; Ether lipid metabolism                                                              |
| Ethylbenzene degradation                                   | 19720   | 23562   | Metabolism; Xenobiotics Biodegradation and Metabolism; Ethylbenzene degradation                                   |
| Fatty acid biosynthesis                                    | 215163  | 232007  | Metabolism; Lipid Metabolism; Fatty acid biosynthesis                                                             |
| Fatty acid elongation in mitochondria                      | 1       | 2       | Metabolism; Lipid Metabolism; Fatty acid elongation in mitochondria                                               |
| Fatty acid metabolism                                      | 215786  | 250382  | Metabolism; Lipid Metabolism; Fatty acid metabolism                                                               |
| Fc gamma R-mediated phagocytosis                           | 37      | 91      | Organismal Systems; Immune System; Fc gamma R-mediated phagocytosis                                               |
| Flagellar assembly                                         | 61259   | 115477  | Cellular Processes; Cell Motility; Flagellar assembly                                                             |
| Flavone and flavonol biosynthesis                          | 43      | 135     | Metabolism; Biosynthesis of Other Secondary Metabolites; Flavone and flavonol biosynthesis                        |
| Flavonoid biosynthesis                                     | 37907   | 35454   | Metabolism; Biosynthesis of Other Secondary Metabolites; Flavonoid biosynthesis                                   |
| Fluorobenzoate degradation                                 | 31217   | 34316   | Metabolism; Xenobiotics Biodegradation and Metabolism; Fluorobenzoate degradation                                 |

|                                                            |         |         |                                                                                                            |
|------------------------------------------------------------|---------|---------|------------------------------------------------------------------------------------------------------------|
| Focal adhesion                                             | 1       | 0       | Cellular Processes; Cell Communication; Focal adhesion                                                     |
| Folate biosynthesis                                        | 210189  | 222194  | Metabolism; Metabolism of Cofactors and Vitamins; Folate biosynthesis                                      |
| Fructose and mannose metabolism                            | 305554  | 315602  | Metabolism; Carbohydrate Metabolism; Fructose and mannose metabolism                                       |
| Function unknown                                           | 637236  | 714153  | Unclassified; Poorly Characterized; Function unknown                                                       |
| G protein-coupled receptors                                | 17      | 76      | Environmental Information Processing; Signaling Molecules and Interaction; G protein-coupled receptors     |
| Galactose metabolism                                       | 142191  | 154442  | Metabolism; Carbohydrate Metabolism; Galactose metabolism                                                  |
| Gastric acid secretion                                     | 1       | 0       | Organismal Systems; Digestive System; Gastric acid secretion                                               |
| General function prediction only                           | 1704553 | 1799146 | Unclassified; Poorly Characterized; General function prediction only                                       |
| Geraniol degradation                                       | 56459   | 76947   | Metabolism; Metabolism of Terpenoids and Polyketides; Geraniol degradation                                 |
| Germination                                                | 2058    | 2027    | Unclassified; Cellular Processes and Signaling; Germination                                                |
| Glutamatergic synapse                                      | 45635   | 46469   | Organismal Systems; Nervous System; Glutamatergic synapse                                                  |
| Glutathione metabolism                                     | 235481  | 255269  | Metabolism; Metabolism of Other Amino Acids; Glutathione metabolism                                        |
| Glycan biosynthesis and metabolism                         | 29437   | 32778   | Unclassified; Metabolism; Glycan biosynthesis and metabolism                                               |
| Glycerolipid metabolism                                    | 150548  | 157894  | Metabolism; Lipid Metabolism; Glycerolipid metabolism                                                      |
| Glycerophospholipid metabolism                             | 195401  | 216014  | Metabolism; Lipid Metabolism; Glycerophospholipid metabolism                                               |
| Glycine, serine and threonine metabolism                   | 313882  | 349916  | Metabolism; Amino Acid Metabolism; Glycine, serine and threonine metabolism                                |
| Glycolysis / Gluconeogenesis                               | 504855  | 528161  | Metabolism; Carbohydrate Metabolism; Glycolysis / Gluconeogenesis                                          |
| Glycosaminoglycan degradation                              | 3080    | 5295    | Metabolism; Glycan Biosynthesis and Metabolism; Glycosaminoglycan degradation                              |
| Glycosphingolipid biosynthesis - ganglio series            | 1990    | 3416    | Metabolism; Glycan Biosynthesis and Metabolism; Glycosphingolipid biosynthesis - ganglio series            |
| Glycosphingolipid biosynthesis - globo series              | 3648    | 5924    | Metabolism; Glycan Biosynthesis and Metabolism; Glycosphingolipid biosynthesis - globo series              |
| Glycosphingolipid biosynthesis - lacto and neolacto series | 31      | 98      | Metabolism; Glycan Biosynthesis and Metabolism; Glycosphingolipid biosynthesis - lacto and neolacto series |
| Glycosylphosphatidylinositol(GPI)-anchor biosynthesis      | 3       | 0       | Metabolism; Glycan Biosynthesis and Metabolism; Glycosylphosphatidylinositol(GPI)-anchor biosynthesis      |
| Glycosyltransferases                                       | 260557  | 261461  | Metabolism; Glycan Biosynthesis and Metabolism; Glycosyltransferases                                       |
| Glyoxylate and dicarboxylate metabolism                    | 250193  | 285768  | Metabolism; Carbohydrate Metabolism; Glyoxylate and dicarboxylate metabolism                               |
| GnRH signaling pathway                                     | 37      | 91      | Organismal Systems; Endocrine System; GnRH signaling pathway                                               |
| Hematopoietic cell lineage                                 | 8       | 12      | Organismal Systems; Immune System; Hematopoietic cell lineage                                              |
| Hepatitis C                                                | 2       | 14      | Human Diseases; Infectious Diseases; Hepatitis C                                                           |
| Histidine metabolism                                       | 212404  | 229028  | Metabolism; Amino Acid Metabolism; Histidine metabolism                                                    |
| Homologous recombination                                   | 354149  | 371445  | Genetic Information Processing; Replication and Repair; Homologous recombination                           |
| Huntington's disease                                       | 48620   | 55078   | Human Diseases; Neurodegenerative Diseases; Huntington's disease                                           |
| Hypertrophic cardiomyopathy (HCM)                          | 178     | 261     | Human Diseases; Cardiovascular Diseases; Hypertrophic cardiomyopathy (HCM)                                 |
| Indole alkaloid biosynthesis                               | 57      | 189     | Metabolism; Biosynthesis of Other Secondary Metabolites; Indole alkaloid biosynthesis                      |
| Influenza A                                                | 5493    | 7245    | Human Diseases; Infectious Diseases; Influenza A                                                           |
| Inorganic ion transport and metabolism                     | 81293   | 102839  | Unclassified; Cellular Processes and Signaling; Inorganic ion transport and metabolism                     |
| Inositol phosphate metabolism                              | 59633   | 68616   | Metabolism; Carbohydrate Metabolism;                                                                       |

|                                                 |        |        |                                                                                                                    |
|-------------------------------------------------|--------|--------|--------------------------------------------------------------------------------------------------------------------|
|                                                 |        |        | Inositol phosphate metabolism                                                                                      |
| Insulin signaling pathway                       | 76655  | 72766  | Organismal Systems; Endocrine System; Insulin signaling pathway                                                    |
| Ion channels                                    | 14475  | 15014  | Environmental Information Processing; Signaling Molecules and Interaction; Ion channels                            |
| Isoflavonoid biosynthesis                       | 24     | 41     | Metabolism; Biosynthesis of Other Secondary Metabolites; Isoflavonoid biosynthesis                                 |
| Isoquinoline alkaloid biosynthesis              | 19648  | 22116  | Metabolism; Biosynthesis of Other Secondary Metabolites; Isoquinoline alkaloid biosynthesis                        |
| Leishmaniasis                                   | 0      | 2      | Human Diseases; Infectious Diseases; Leishmaniasis                                                                 |
| Leukocyte transendothelial migration            | 1      | 0      | Organismal Systems; Immune System; Leukocyte transendothelial migration                                            |
| Limonene and pinene degradation                 | 69031  | 88626  | Metabolism; Metabolism of Terpenoids and Polyketides; Limonene and pinene degradation                              |
| Linoleic acid metabolism                        | 5268   | 8810   | Metabolism; Lipid Metabolism; Linoleic acid metabolism                                                             |
| Lipid biosynthesis proteins                     | 310742 | 334751 | Metabolism; Lipid Metabolism; Lipid biosynthesis proteins                                                          |
| Lipid metabolism                                | 75918  | 79376  | Unclassified; Metabolism; Lipid metabolism                                                                         |
| Lipoic acid metabolism                          | 58807  | 58371  | Metabolism; Metabolism of Cofactors and Vitamins; Lipoic acid metabolism                                           |
| Lipopolysaccharide biosynthesis                 | 101377 | 113232 | Metabolism; Glycan Biosynthesis and Metabolism; Lipopolysaccharide biosynthesis                                    |
| Lipopolysaccharide biosynthesis proteins        | 122844 | 143524 | Metabolism; Glycan Biosynthesis and Metabolism; Lipopolysaccharide biosynthesis proteins                           |
| Lysine biosynthesis                             | 255583 | 275065 | Metabolism; Amino Acid Metabolism; Lysine biosynthesis                                                             |
| Lysine degradation                              | 97137  | 123725 | Metabolism; Amino Acid Metabolism; Lysine degradation                                                              |
| Lysosome                                        | 4602   | 7896   | Cellular Processes; Transport and Catabolism; Lysosome                                                             |
| MAPK signaling pathway - yeast                  | 16082  | 18028  | Environmental Information Processing; Signal Transduction; MAPK signaling pathway - yeast                          |
| Measles                                         | 2      | 14     | Human Diseases; Infectious Diseases; Measles                                                                       |
| Meiosis - yeast                                 | 51606  | 48271  | Cellular Processes; Cell Growth and Death; Meiosis - yeast                                                         |
| Melanogenesis                                   | 44     | 114    | Organismal Systems; Endocrine System; Melanogenesis                                                                |
| Membrane and intracellular structural molecules | 263325 | 301272 | Unclassified; Cellular Processes and Signaling; Membrane and intracellular structural molecules                    |
| Metabolism of cofactors and vitamins            | 77260  | 84987  | Unclassified; Metabolism; Metabolism of cofactors and vitamins                                                     |
| Metabolism of xenobiotics by cytochrome P450    | 120562 | 128466 | Metabolism; Xenobiotics Biodegradation and Metabolism; Metabolism of xenobiotics by cytochrome P450                |
| Methane metabolism                              | 445565 | 468285 | Metabolism; Energy Metabolism; Methane metabolism                                                                  |
| Mineral absorption                              | 37521  | 35150  | Organismal Systems; Digestive System; Mineral absorption                                                           |
| Mismatch repair                                 | 319428 | 333079 | Genetic Information Processing; Replication and Repair; Mismatch repair                                            |
| N-Glycan biosynthesis                           | 38945  | 36793  | Metabolism; Glycan Biosynthesis and Metabolism; N-Glycan biosynthesis                                              |
| NOD-like receptor signaling pathway             | 15975  | 16038  | Organismal Systems; Immune System; NOD-like receptor signaling pathway                                             |
| Naphthalene degradation                         | 82261  | 91047  | Metabolism; Xenobiotics Biodegradation and Metabolism; Naphthalene degradation                                     |
| Neuroactive ligand-receptor interaction         | 3      | 5      | Environmental Information Processing; Signaling Molecules and Interaction; Neuroactive ligand-receptor interaction |
| Nicotinate and nicotinamide metabolism          | 182385 | 196210 | Metabolism; Metabolism of Cofactors and Vitamins; Nicotinate and nicotinamide metabolism                           |
| Nitrogen metabolism                             | 269172 | 297689 | Metabolism; Energy Metabolism; Nitrogen metabolism                                                                 |
| Nitrotoluene degradation                        | 19305  | 22781  | Metabolism; Xenobiotics Biodegradation and Metabolism; Nitrotoluene degradation                                    |
| Non-homologous end-joining                      | 5512   | 7762   | Genetic Information Processing; Replication and Repair; Non-homologous end-joining                                 |

|                                                     |         |        |                                                                                                    |
|-----------------------------------------------------|---------|--------|----------------------------------------------------------------------------------------------------|
| Notch signaling pathway                             | 0       | 1      | Environmental Information Processing; Signal Transduction; Notch signaling pathway                 |
| Novobiocin biosynthesis                             | 48917   | 53558  | Metabolism; Biosynthesis of Other Secondary Metabolites; Novobiocin biosynthesis                   |
| Nucleotide excision repair                          | 137327  | 144380 | Genetic Information Processing; Replication and Repair; Nucleotide excision repair                 |
| Nucleotide metabolism                               | 3651    | 7068   | Unclassified; Metabolism; Nucleotide metabolism                                                    |
| One carbon pool by folate                           | 213824  | 228369 | Metabolism; Metabolism of Cofactors and Vitamins; One carbon pool by folate                        |
| Other glycan degradation                            | 21760   | 27428  | Metabolism; Glycan Biosynthesis and Metabolism; Other glycan degradation                           |
| Other ion-coupled transporters                      | 413842  | 474044 | Unclassified; Cellular Processes and Signaling; Other ion-coupled transporters                     |
| Other transporters                                  | 122020  | 132201 | Unclassified; Cellular Processes and Signaling; Other transporters                                 |
| Others                                              | 575581  | 591455 | Unclassified; Metabolism; Others                                                                   |
| Oxidative phosphorylation                           | 725064  | 754474 | Metabolism; Energy Metabolism; Oxidative phosphorylation                                           |
| PPAR signaling pathway                              | 77190   | 82356  | Organismal Systems; Endocrine System; PPAR signaling pathway                                       |
| Pancreatic secretion                                | 4       | 5      | Organismal Systems; Digestive System; Pancreatic secretion                                         |
| Pantothenate and CoA biosynthesis                   | 268345  | 281208 | Metabolism; Metabolism of Cofactors and Vitamins; Pantothenate and CoA biosynthesis                |
| Parkinson's disease                                 | 17342   | 22081  | Human Diseases; Neurodegenerative Diseases; Parkinson's disease                                    |
| Pathogenic Escherichia coli infection               | 1       | 0      | Human Diseases; Infectious Diseases; Pathogenic Escherichia coli infection                         |
| Pathways in cancer                                  | 38475   | 41009  | Human Diseases; Cancers; Pathways in cancer                                                        |
| Penicillin and cephalosporin biosynthesis           | 16641   | 19351  | Metabolism; Biosynthesis of Other Secondary Metabolites; Penicillin and cephalosporin biosynthesis |
| Pentose and glucuronate interconversions            | 122994  | 140385 | Metabolism; Carbohydrate Metabolism; Pentose and glucuronate interconversions                      |
| Pentose phosphate pathway                           | 351792  | 368325 | Metabolism; Carbohydrate Metabolism; Pentose phosphate pathway                                     |
| Peptidases                                          | 919137  | 938869 | Metabolism; Enzyme Families; Peptidases                                                            |
| Peptidoglycan biosynthesis                          | 312455  | 328482 | Metabolism; Glycan Biosynthesis and Metabolism; Peptidoglycan biosynthesis                         |
| Peroxisome                                          | 100759  | 110823 | Cellular Processes; Transport and Catabolism; Peroxisome                                           |
| Pertussis                                           | 17714   | 24045  | Human Diseases; Infectious Diseases; Pertussis                                                     |
| Phagosome                                           | 3       | 0      | Cellular Processes; Transport and Catabolism; Phagosome                                            |
| Phenylalanine metabolism                            | 110654  | 127668 | Metabolism; Amino Acid Metabolism; Phenylalanine metabolism                                        |
| Phenylalanine, tyrosine and tryptophan biosynthesis | 308740  | 327511 | Metabolism; Amino Acid Metabolism; Phenylalanine, tyrosine and tryptophan biosynthesis             |
| Phenylpropanoid biosynthesis                        | 58161   | 59994  | Metabolism; Biosynthesis of Other Secondary Metabolites; Phenylpropanoid biosynthesis              |
| Phosphatidylinositol signaling system               | 61448   | 62669  | Environmental Information Processing; Signal Transduction; Phosphatidylinositol signaling system   |
| Phosphonate and phosphinate metabolism              | 5351    | 10197  | Metabolism; Metabolism of Other Amino Acids; Phosphonate and phosphinate metabolism                |
| Phosphotransferase system (PTS)                     | 26487   | 49888  | Environmental Information Processing; Membrane Transport; Phosphotransferase system (PTS)          |
| Photosynthesis                                      | 851821  | 789116 | Metabolism; Energy Metabolism; Photosynthesis                                                      |
| Photosynthesis - antenna proteins                   | 205372  | 185490 | Metabolism; Energy Metabolism; Photosynthesis - antenna proteins                                   |
| Photosynthesis proteins                             | 1071846 | 990230 | Metabolism; Energy Metabolism; Photosynthesis proteins                                             |
| Phototransduction - fly                             | 1       | 0      | Organismal Systems; Sensory System; Phototransduction - fly                                        |
| Plant-pathogen interaction                          | 39250   | 44630  | Organismal Systems; Environmental Adaptation; Plant-pathogen interaction                           |
| Polycyclic aromatic hydrocarbon degradation         | 59562   | 60786  | Metabolism; Xenobiotics Biodegradation and Metabolism; Polycyclic aromatic hydrocarbon             |



|                                                |        |        |                                                                                                               |
|------------------------------------------------|--------|--------|---------------------------------------------------------------------------------------------------------------|
|                                                |        |        | degradation                                                                                                   |
| Polyketide sugar unit biosynthesis             | 95262  | 95422  | Metabolism; Metabolism of Terpenoids and Polyketides; Polyketide sugar unit biosynthesis                      |
| Pores ion channels                             | 282112 | 309621 | Unclassified; Cellular Processes and Signaling; Pores ion channels                                            |
| Porphyrin and chlorophyll metabolism           | 828519 | 812821 | Metabolism; Metabolism of Cofactors and Vitamins; Porphyrin and chlorophyll metabolism                        |
| Prenyltransferases                             | 232592 | 231116 | Metabolism; Metabolism of Terpenoids and Polyketides; Prenyltransferases                                      |
| Primary bile acid biosynthesis                 | 1274   | 2250   | Metabolism; Lipid Metabolism; Primary bile acid biosynthesis                                                  |
| Primary immunodeficiency                       | 16050  | 17843  | Human Diseases; Immune System Diseases; Primary immunodeficiency                                              |
| Prion diseases                                 | 1458   | 2848   | Human Diseases; Neurodegenerative Diseases; Prion diseases                                                    |
| Progesterone-mediated oocyte maturation        | 15963  | 16020  | Organismal Systems; Endocrine System; Progesterone-mediated oocyte maturation                                 |
| Propanoate metabolism                          | 226268 | 273714 | Metabolism; Carbohydrate Metabolism; Propanoate metabolism                                                    |
| Prostate cancer                                | 15965  | 16024  | Human Diseases; Cancers; Prostate cancer                                                                      |
| Proteasome                                     | 16768  | 16761  | Genetic Information Processing; Folding, Sorting and Degradation; Proteasome                                  |
| Protein digestion and absorption               | 1008   | 1800   | Organismal Systems; Digestive System; Protein digestion and absorption                                        |
| Protein export                                 | 261189 | 274355 | Genetic Information Processing; Folding, Sorting and Degradation; Protein export                              |
| Protein folding and associated processing      | 437842 | 452927 | Unclassified; Genetic Information Processing; Protein folding and associated processing                       |
| Protein kinases                                | 291294 | 294816 | Metabolism; Enzyme Families; Protein kinases                                                                  |
| Protein processing in endoplasmic reticulum    | 54697  | 52933  | Genetic Information Processing; Folding, Sorting and Degradation; Protein processing in endoplasmic reticulum |
| Proximal tubule bicarbonate reclamation        | 14457  | 15078  | Organismal Systems; Excretory System; Proximal tubule bicarbonate reclamation                                 |
| Purine metabolism                              | 920757 | 976993 | Metabolism; Nucleotide Metabolism; Purine metabolism                                                          |
| Pyrimidine metabolism                          | 616354 | 653968 | Metabolism; Nucleotide Metabolism; Pyrimidine metabolism                                                      |
| Pyruvate metabolism                            | 488030 | 521995 | Metabolism; Carbohydrate Metabolism; Pyruvate metabolism                                                      |
| RIG-I-like receptor signaling pathway          | 720    | 765    | Organismal Systems; Immune System; RIG-I-like receptor signaling pathway                                      |
| RNA degradation                                | 268342 | 272844 | Genetic Information Processing; Folding, Sorting and Degradation; RNA degradation                             |
| RNA polymerase                                 | 80795  | 82363  | Genetic Information Processing; Transcription; RNA polymerase                                                 |
| RNA transport                                  | 40236  | 41423  | Genetic Information Processing; Translation; RNA transport                                                    |
| Regulation of actin cytoskeleton               | 1      | 0      | Cellular Processes; Cell Motility; Regulation of actin cytoskeleton                                           |
| Renal cell carcinoma                           | 17025  | 17760  | Human Diseases; Cancers; Renal cell carcinoma                                                                 |
| Renin-angiotensin system                       | 469    | 668    | Organismal Systems; Endocrine System; Renin-angiotensin system                                                |
| Replication, recombination and repair proteins | 443521 | 452286 | Unclassified; Genetic Information Processing; Replication, recombination and repair proteins                  |
| Restriction enzyme                             | 53754  | 54005  | Unclassified; Genetic Information Processing; Restriction enzyme                                              |
| Retinol metabolism                             | 56469  | 57681  | Metabolism; Metabolism of Cofactors and Vitamins; Retinol metabolism                                          |
| Riboflavin metabolism                          | 149261 | 155634 | Metabolism; Metabolism of Cofactors and Vitamins; Riboflavin metabolism                                       |
| Ribosome                                       | 935870 | 972158 | Genetic Information Processing; Translation; Ribosome                                                         |
| Ribosome Biogenesis                            | 502139 | 541499 | Genetic Information Processing; Translation; Ribosome Biogenesis                                              |
| Ribosome biogenesis in eukaryotes              | 18474  | 20461  | Genetic Information Processing; Translation; Ribosome biogenesis in eukaryotes                                |
| Salivary secretion                             | 1      | 0      | Organismal Systems; Digestive System; Salivary secretion                                                      |
| Secondary bile acid biosynthesis               | 385    | 636    | Metabolism; Lipid Metabolism; Secondary bile acid biosynthesis                                                |

|                                                        |         |         |                                                                                                                 |
|--------------------------------------------------------|---------|---------|-----------------------------------------------------------------------------------------------------------------|
| Secretion system                                       | 737696  | 826902  | Environmental Information Processing; Membrane Transport; Secretion system                                      |
| Selenocompound metabolism                              | 145993  | 158133  | Metabolism; Metabolism of Other Amino Acids; Selenocompound metabolism                                          |
| Sesquiterpenoid biosynthesis                           | 10      | 17      | Metabolism; Metabolism of Terpenoids and Polyketides; Sesquiterpenoid biosynthesis                              |
| Shigellosis                                            | 116     | 442     | Human Diseases; Infectious Diseases; Shigellosis                                                                |
| Signal transduction mechanisms                         | 271634  | 282453  | Unclassified; Cellular Processes and Signaling; Signal transduction mechanisms                                  |
| Small cell lung cancer                                 | 5487    | 7228    | Human Diseases; Cancers; Small cell lung cancer                                                                 |
| Sphingolipid metabolism                                | 18584   | 21506   | Metabolism; Lipid Metabolism; Sphingolipid metabolism                                                           |
| Sporulation                                            | 34020   | 34857   | Unclassified; Cellular Processes and Signaling; Sporulation                                                     |
| Staphylococcus aureus infection                        | 1571    | 2666    | Human Diseases; Infectious Diseases; Staphylococcus aureus infection                                            |
| Starch and sucrose metabolism                          | 367878  | 374326  | Metabolism; Carbohydrate Metabolism; Starch and sucrose metabolism                                              |
| Steroid biosynthesis                                   | 24821   | 22846   | Metabolism; Lipid Metabolism; Steroid biosynthesis                                                              |
| Steroid hormone biosynthesis                           | 14549   | 14687   | Metabolism; Lipid Metabolism; Steroid hormone biosynthesis                                                      |
| Stilbenoid, diarylheptanoid and gingerol biosynthesis  | 26236   | 24959   | Metabolism; Biosynthesis of Other Secondary Metabolites; Stilbenoid, diarylheptanoid and gingerol biosynthesis  |
| Streptomycin biosynthesis                              | 169510  | 171012  | Metabolism; Biosynthesis of Other Secondary Metabolites; Streptomycin biosynthesis                              |
| Styrene degradation                                    | 22942   | 29875   | Metabolism; Xenobiotics Biodegradation and Metabolism; Styrene degradation                                      |
| Sulfur metabolism                                      | 149504  | 160077  | Metabolism; Energy Metabolism; Sulfur metabolism                                                                |
| Sulfur relay system                                    | 188365  | 195701  | Genetic Information Processing; Folding, Sorting and Degradation; Sulfur relay system                           |
| Synthesis and degradation of ketone bodies             | 15448   | 26137   | Metabolism; Lipid Metabolism; Synthesis and degradation of ketone bodies                                        |
| Systemic lupus erythematosus                           | 57      | 87      | Human Diseases; Immune System Diseases; Systemic lupus erythematosus                                            |
| Taurine and hypotaurine metabolism                     | 47526   | 52564   | Metabolism; Metabolism of Other Amino Acids; Taurine and hypotaurine metabolism                                 |
| Terpenoid backbone biosynthesis                        | 240308  | 250720  | Metabolism; Metabolism of Terpenoids and Polyketides; Terpenoid backbone biosynthesis                           |
| Tetracycline biosynthesis                              | 71195   | 75070   | Metabolism; Metabolism of Terpenoids and Polyketides; Tetracycline biosynthesis                                 |
| Thiamine metabolism                                    | 176800  | 186116  | Metabolism; Metabolism of Cofactors and Vitamins; Thiamine metabolism                                           |
| Tight junction                                         | 1       | 0       | Cellular Processes; Cell Communication; Tight junction                                                          |
| Toluene degradation                                    | 77258   | 85826   | Metabolism; Xenobiotics Biodegradation and Metabolism; Toluene degradation                                      |
| Toxoplasmosis                                          | 5487    | 7226    | Human Diseases; Infectious Diseases; Toxoplasmosis                                                              |
| Transcription factors                                  | 445041  | 521814  | Genetic Information Processing; Transcription; Transcription factors                                            |
| Transcription machinery                                | 331412  | 351342  | Genetic Information Processing; Transcription; Transcription machinery                                          |
| Transcription related proteins                         | 1135    | 2337    | Unclassified; Genetic Information Processing; Transcription related proteins                                    |
| Translation factors                                    | 212820  | 221028  | Genetic Information Processing; Translation; Translation factors                                                |
| Translation proteins                                   | 387469  | 406983  | Unclassified; Genetic Information Processing; Translation proteins                                              |
| Transporters                                           | 2514549 | 2648494 | Environmental Information Processing; Membrane Transport; Transporters                                          |
| Tropane, piperidine and pyridine alkaloid biosynthesis | 49491   | 54244   | Metabolism; Biosynthesis of Other Secondary Metabolites; Tropane, piperidine and pyridine alkaloid biosynthesis |
| Tryptophan metabolism                                  | 133934  | 166869  | Metabolism; Amino Acid Metabolism; Tryptophan metabolism                                                        |
| Tuberculosis                                           | 152222  | 147306  | Human Diseases; Infectious Diseases; Tuberculosis                                                               |
| Two-component system                                   | 931021  | 1023531 | Environmental Information Processing; Signal Transduction; Two-component system                                 |
| Type I diabetes mellitus                               | 29963   | 29675   | Human Diseases; Metabolic Diseases; Type I                                                                      |

|                                                     |        |        | diabetes mellitus                                                                                     |
|-----------------------------------------------------|--------|--------|-------------------------------------------------------------------------------------------------------|
| Type II diabetes mellitus                           | 39124  | 38047  | Human Diseases; Metabolic Diseases; Type II diabetes mellitus                                         |
| Tyrosine metabolism                                 | 188105 | 203990 | Metabolism; Amino Acid Metabolism; Tyrosine metabolism                                                |
| Ubiquinone and other terpenoid-quinone biosynthesis | 290082 | 289640 | Metabolism; Metabolism of Cofactors and Vitamins; Ubiquinone and other terpenoid-quinone biosynthesis |
| Ubiquitin system                                    | 13176  | 12794  | Genetic Information Processing; Folding, Sorting and Degradation; Ubiquitin system                    |
| VEGF signaling pathway                              | 0      | 2      | Environmental Information Processing; Signal Transduction; VEGF signaling pathway                     |
| Valine, leucine and isoleucine biosynthesis         | 326067 | 346197 | Metabolism; Amino Acid Metabolism; Valine, leucine and isoleucine biosynthesis                        |
| Valine, leucine and isoleucine degradation          | 193648 | 241348 | Metabolism; Amino Acid Metabolism; Valine, leucine and isoleucine degradation                         |
| Various types of N-glycan biosynthesis              | 7      | 17     | Metabolism; Glycan Biosynthesis and Metabolism; Various types of N-glycan biosynthesis                |
| Vasopressin-regulated water reabsorption            | 4      | 4      | Organismal Systems; Excretory System; Vasopressin-regulated water reabsorption                        |
| Vibrio cholerae infection                           | 109    | 184    | Human Diseases; Infectious Diseases; Vibrio cholerae infection                                        |
| Vibrio cholerae pathogenic cycle                    | 67634  | 68721  | Human Diseases; Infectious Diseases; Vibrio cholerae pathogenic cycle                                 |
| Viral myocarditis                                   | 5488   | 7226   | Human Diseases; Cardiovascular Diseases; Viral myocarditis                                            |
| Vitamin B6 metabolism                               | 75547  | 81753  | Metabolism; Metabolism of Cofactors and Vitamins; Vitamin B6 metabolism                               |
| Wnt signaling pathway                               | 0      | 1      | Environmental Information Processing; Signal Transduction; Wnt signaling pathway                      |
| Xylene degradation                                  | 29865  | 30432  | Metabolism; Xenobiotics Biodegradation and Metabolism; Xylene degradation                             |
| Zeatin biosynthesis                                 | 17273  | 17976  | Metabolism; Metabolism of Terpenoids and Polyketides; Zeatin biosynthesis                             |
| alpha-Linolenic acid metabolism                     | 15753  | 17722  | Metabolism; Lipid Metabolism; alpha-Linolenic acid metabolism                                         |
| beta-Alanine metabolism                             | 126329 | 148008 | Metabolism; Metabolism of Other Amino Acids; beta-Alanine metabolism                                  |
| beta-Lactam resistance                              | 15451  | 17358  | Metabolism; Biosynthesis of Other Secondary Metabolites; beta-Lactam resistance                       |
| mRNA surveillance pathway                           | 17     | 43     | Genetic Information Processing; Translation; mRNA surveillance pathway                                |
| mTOR signaling pathway                              | 2      | 14     | Environmental Information Processing; Signal Transduction; mTOR signaling pathway                     |
| p53 signaling pathway                               | 5542   | 7320   | Cellular Processes; Cell Growth and Death; p53 signaling pathway                                      |

Table S4 Results of PICRUST at level 3 KEGG Orthology using the V5-V7 amplification regions

| OTU ID                                                          | A1(V5V7) | B1(V5V7) | KEGG Pathways                                                                                                          |
|-----------------------------------------------------------------|----------|----------|------------------------------------------------------------------------------------------------------------------------|
| 1,1,1-Trichloro-2,2-bis(4-chlorophenyl)ethane (DDT) degradation | 93       | 72       | Metabolism; Xenobiotics Biodegradation and Metabolism; 1,1,1-Trichloro-2,2-bis(4-chlorophenyl)ethane (DDT) degradation |
| ABC transporters                                                | 1152756  | 1034806  | Environmental Information Processing; Membrane Transport; ABC transporters                                             |
| Adherens junction                                               | 2        | 0        | Cellular Processes; Cell Communication; Adherens junction                                                              |
| Adipocytokine signaling pathway                                 | 23664    | 19686    | Organismal Systems; Endocrine System; Adipocytokine signaling pathway                                                  |
| African trypanosomiasis                                         | 7975     | 7534     | Human Diseases; Infectious Diseases; African trypanosomiasis                                                           |
| Alanine, aspartate and glutamate metabolism                     | 259550   | 244164   | Metabolism; Amino Acid Metabolism; Alanine, aspartate and glutamate metabolism                                         |
| Alzheimer's disease                                             | 36604    | 36688    | Human Diseases; Neurodegenerative Diseases; Alzheimer's disease                                                        |
| Amino acid metabolism                                           | 66801    | 66012    | Unclassified; Metabolism; Amino acid metabolism                                                                        |
| Amino acid related enzymes                                      | 345277   | 338639   | Metabolism; Amino Acid Metabolism; Amino acid related enzymes                                                          |
| Amino sugar and nucleotide sugar metabolism                     | 303066   | 302779   | Metabolism; Carbohydrate Metabolism; Amino sugar and nucleotide sugar metabolism                                       |
| Aminoacyl-tRNA biosynthesis                                     | 251361   | 237375   | Genetic Information Processing; Translation; Aminoacyl-tRNA biosynthesis                                               |
| Aminobenzoate degradation                                       | 143078   | 124027   | Metabolism; Xenobiotics Biodegradation and Metabolism; Aminobenzoate degradation                                       |
| Amoebiasis                                                      | 3426     | 2467     | Human Diseases; Infectious Diseases; Amoebiasis                                                                        |
| Amyotrophic lateral sclerosis (ALS)                             | 24767    | 25365    | Human Diseases; Neurodegenerative Diseases; Amyotrophic lateral sclerosis (ALS)                                        |
| Antigen processing and presentation                             | 4409     | 4298     | Organismal Systems; Immune System; Antigen processing and presentation                                                 |
| Apoptosis                                                       | 11190    | 11129    | Cellular Processes; Cell Growth and Death; Apoptosis                                                                   |
| Arachidonic acid metabolism                                     | 25529    | 26092    | Metabolism; Lipid Metabolism; Arachidonic acid metabolism                                                              |
| Arginine and proline metabolism                                 | 375828   | 359626   | Metabolism; Amino Acid Metabolism; Arginine and proline metabolism                                                     |
| Arrhythmogenic right ventricular cardiomyopathy (ARVC)          | 2        | 0        | Human Diseases; Cardiovascular Diseases; Arrhythmogenic right ventricular cardiomyopathy (ARVC)                        |
| Ascorbate and aldarate metabolism                               | 73054    | 76515    | Metabolism; Carbohydrate Metabolism; Ascorbate and aldarate metabolism                                                 |
| Atrazine degradation                                            | 19057    | 16905    | Metabolism; Xenobiotics Biodegradation and Metabolism; Atrazine degradation                                            |
| Bacterial chemotaxis                                            | 215416   | 218047   | Cellular Processes; Cell Motility; Bacterial chemotaxis                                                                |
| Bacterial invasion of epithelial cells                          | 365      | 508      | Human Diseases; Infectious Diseases; Bacterial invasion of epithelial cells                                            |
| Bacterial motility proteins                                     | 519699   | 530613   | Cellular Processes; Cell Motility; Bacterial motility proteins                                                         |
| Bacterial secretion system                                      | 267338   | 287188   | Environmental Information Processing; Membrane Transport; Bacterial secretion system                                   |
| Bacterial toxins                                                | 22578    | 20863    | Environmental Information Processing; Signaling Molecules and Interaction; Bacterial toxins                            |
| Basal transcription factors                                     | 1527     | 962      | Genetic Information Processing; Transcription; Basal transcription factors                                             |
| Base excision repair                                            | 133749   | 122252   | Genetic Information Processing; Replication and Repair; Base excision repair                                           |
| Benzoate degradation                                            | 197968   | 181667   | Metabolism; Xenobiotics Biodegradation and Metabolism; Benzoate degradation                                            |
| Betalain biosynthesis                                           | 286      | 260      | Metabolism; Biosynthesis of Other Secondary Metabolites; Betalain biosynthesis                                         |
| Bile secretion                                                  | 933      | 1086     | Organismal Systems; Digestive System; Bile secretion                                                                   |
| Biosynthesis and biodegradation of secondary metabolites        | 36064    | 39319    | Unclassified; Metabolism; Biosynthesis and biodegradation of secondary metabolites                                     |
| Biosynthesis of 12-, 14- and 16-membered macrolides             | 64       | 30       | Metabolism; Metabolism of Terpenoids and Polyketides; Biosynthesis of 12-, 14- and 16-membered macrolides              |

|                                                         |        |        |                                                                                                               |
|---------------------------------------------------------|--------|--------|---------------------------------------------------------------------------------------------------------------|
| Biosynthesis of ansamycins                              | 19017  | 20356  | Metabolism; Metabolism of Terpenoids and Polyketides; Biosynthesis of ansamycins                              |
| Biosynthesis of siderophore group nonribosomal peptides | 23142  | 26699  | Metabolism; Metabolism of Terpenoids and Polyketides; Biosynthesis of siderophore group nonribosomal peptides |
| Biosynthesis of type II polyketide backbone             | 136    | 36     | Metabolism; Metabolism of Terpenoids and Polyketides; Biosynthesis of type II polyketide backbone             |
| Biosynthesis of type II polyketide products             | 202    | 177    | Metabolism; Metabolism of Terpenoids and Polyketides; Biosynthesis of type II polyketide products             |
| Biosynthesis of unsaturated fatty acids                 | 84219  | 79866  | Metabolism; Lipid Metabolism; Biosynthesis of unsaturated fatty acids                                         |
| Biosynthesis of vancomycin group antibiotics            | 12205  | 11816  | Metabolism; Metabolism of Terpenoids and Polyketides; Biosynthesis of vancomycin group antibiotics            |
| Biotin metabolism                                       | 39729  | 41719  | Metabolism; Metabolism of Cofactors and Vitamins; Biotin metabolism                                           |
| Bisphenol degradation                                   | 34217  | 23824  | Metabolism; Xenobiotics Biodegradation and Metabolism; Bisphenol degradation                                  |
| Bladder cancer                                          | 5210   | 5289   | Human Diseases; Cancers; Bladder cancer                                                                       |
| Butanoate metabolism                                    | 352235 | 330090 | Metabolism; Carbohydrate Metabolism; Butanoate metabolism                                                     |
| Butirosin and neomycin biosynthesis                     | 11887  | 10534  | Metabolism; Biosynthesis of Other Secondary Metabolites; Butirosin and neomycin biosynthesis                  |
| C5-Branched dibasic acid metabolism                     | 89214  | 89350  | Metabolism; Carbohydrate Metabolism; C5-Branched dibasic acid metabolism                                      |
| CAM ligands                                             | 1      | 0      | Environmental Information Processing; Signaling Molecules and Interaction; CAM ligands                        |
| Caffeine metabolism                                     | 1404   | 977    | Metabolism; Biosynthesis of Other Secondary Metabolites; Caffeine metabolism                                  |
| Calcium signaling pathway                               | 6      | 8      | Environmental Information Processing; Signal Transduction; Calcium signaling pathway                          |
| Caprolactam degradation                                 | 95406  | 88503  | Metabolism; Xenobiotics Biodegradation and Metabolism; Caprolactam degradation                                |
| Carbohydrate digestion and absorption                   | 3715   | 4075   | Organismal Systems; Digestive System; Carbohydrate digestion and absorption                                   |
| Carbohydrate metabolism                                 | 52976  | 53374  | Unclassified; Metabolism; Carbohydrate metabolism                                                             |
| Carbon fixation in photosynthetic organisms             | 142109 | 143737 | Metabolism; Energy Metabolism; Carbon fixation in photosynthetic organisms                                    |
| Carbon fixation pathways in prokaryotes                 | 303653 | 297220 | Metabolism; Energy Metabolism; Carbon fixation pathways in prokaryotes                                        |
| Cardiac muscle contraction                              | 13684  | 13629  | Organismal Systems; Circulatory System; Cardiac muscle contraction                                            |
| Carotenoid biosynthesis                                 | 15968  | 16003  | Metabolism; Metabolism of Terpenoids and Polyketides; Carotenoid biosynthesis                                 |
| Cell cycle - Caulobacter                                | 158251 | 155004 | Cellular Processes; Cell Growth and Death; Cell cycle - Caulobacter                                           |
| Cell division                                           | 22925  | 24507  | Unclassified; Cellular Processes and Signaling; Cell division                                                 |
| Cell motility and secretion                             | 69534  | 73655  | Unclassified; Cellular Processes and Signaling; Cell motility and secretion                                   |
| Cellular antigens                                       | 24577  | 24363  | Environmental Information Processing; Signaling Molecules and Interaction; Cellular antigens                  |
| Chagas disease (American trypanosomiasis)               | 7384   | 7580   | Human Diseases; Infectious Diseases; Chagas disease (American trypanosomiasis)                                |
| Chaperones and folding catalysts                        | 266529 | 277970 | Genetic Information Processing; Folding, Sorting and Degradation; Chaperones and folding catalysts            |
| Chloroalkane and chloroalkene degradation               | 89540  | 80254  | Metabolism; Xenobiotics Biodegradation and Metabolism; Chloroalkane and chloroalkene degradation              |
| Chlorocyclohexane and chlorobenzene degradation         | 35189  | 31807  | Metabolism; Xenobiotics Biodegradation and Metabolism; Chlorocyclohexane and chlorobenzene degradation        |
| Chromosome                                              | 376076 | 378205 | Genetic Information Processing; Replication and Repair; Chromosome                                            |
| Chronic myeloid leukemia                                | 26     | 2      | Human Diseases; Cancers; Chronic myeloid leukemia                                                             |
| Circadian rhythm - plant                                | 3534   | 3096   | Organismal Systems; Environmental Adaptation; Circadian rhythm - plant                                        |

|                                                            |        |        |                                                                                                                   |
|------------------------------------------------------------|--------|--------|-------------------------------------------------------------------------------------------------------------------|
| Citrate cycle (TCA cycle)                                  | 236595 | 226898 | Metabolism; Carbohydrate Metabolism; Citrate cycle (TCA cycle)                                                    |
| Clavulanic acid biosynthesis                               | 308    | 32     | Metabolism; Biosynthesis of Other Secondary Metabolites; Clavulanic acid biosynthesis                             |
| Colorectal cancer                                          | 10840  | 10854  | Human Diseases; Cancers; Colorectal cancer                                                                        |
| Cyanoamino acid metabolism                                 | 76097  | 76413  | Metabolism; Metabolism of Other Amino Acids; Cyanoamino acid metabolism                                           |
| Cysteine and methionine metabolism                         | 247723 | 246344 | Metabolism; Amino Acid Metabolism; Cysteine and methionine metabolism                                             |
| Cytochrome P450                                            | 512    | 686    | Metabolism; Enzyme Families; Cytochrome P450                                                                      |
| Cytokine receptors                                         | 8      | 2      | Environmental Information Processing; Signaling Molecules and Interaction; Cytokine receptors                     |
| Cytokine-cytokine receptor interaction                     | 8      | 2      | Environmental Information Processing; Signaling Molecules and Interaction; Cytokine-cytokine receptor interaction |
| Cytoskeleton proteins                                      | 63833  | 61688  | Cellular Processes; Cell Motility; Cytoskeleton proteins                                                          |
| D-Alanine metabolism                                       | 26835  | 24981  | Metabolism; Metabolism of Other Amino Acids; D-Alanine metabolism                                                 |
| D-Arginine and D-ornithine metabolism                      | 2610   | 2027   | Metabolism; Metabolism of Other Amino Acids; D-Arginine and D-ornithine metabolism                                |
| D-Glutamine and D-glutamate metabolism                     | 33240  | 32994  | Metabolism; Metabolism of Other Amino Acids; D-Glutamine and D-glutamate metabolism                               |
| DNA repair and recombination proteins                      | 682319 | 659607 | Genetic Information Processing; Replication and Repair; DNA repair and recombination proteins                     |
| DNA replication                                            | 139337 | 135039 | Genetic Information Processing; Replication and Repair; DNA replication                                           |
| DNA replication proteins                                   | 245526 | 242881 | Genetic Information Processing; Replication and Repair; DNA replication proteins                                  |
| Dilated cardiomyopathy (DCM)                               | 2      | 0      | Human Diseases; Cardiovascular Diseases; Dilated cardiomyopathy (DCM)                                             |
| Dioxin degradation                                         | 28748  | 29829  | Metabolism; Xenobiotics Biodegradation and Metabolism; Dioxin degradation                                         |
| Drug metabolism - cytochrome P450                          | 83248  | 80680  | Metabolism; Xenobiotics Biodegradation and Metabolism; Drug metabolism - cytochrome P450                          |
| Drug metabolism - other enzymes                            | 71068  | 67244  | Metabolism; Xenobiotics Biodegradation and Metabolism; Drug metabolism - other enzymes                            |
| ECM-receptor interaction                                   | 1      | 0      | Environmental Information Processing; Signaling Molecules and Interaction; ECM-receptor interaction               |
| Electron transfer carriers                                 | 14876  | 16086  | Unclassified; Cellular Processes and Signaling; Electron transfer carriers                                        |
| Endocytosis                                                | 14     | 8      | Cellular Processes; Transport and Catabolism; Endocytosis                                                         |
| Energy metabolism                                          | 240142 | 241964 | Unclassified; Metabolism; Energy metabolism                                                                       |
| Epithelial cell signaling in Helicobacter pylori infection | 11296  | 12120  | Human Diseases; Infectious Diseases; Epithelial cell signaling in Helicobacter pylori infection                   |
| Ether lipid metabolism                                     | 2912   | 2684   | Metabolism; Lipid Metabolism; Ether lipid metabolism                                                              |
| Ethylbenzene degradation                                   | 27546  | 23673  | Metabolism; Xenobiotics Biodegradation and Metabolism; Ethylbenzene degradation                                   |
| Fatty acid biosynthesis                                    | 151166 | 142432 | Metabolism; Lipid Metabolism; Fatty acid biosynthesis                                                             |
| Fatty acid elongation in mitochondria                      | 6      | 15     | Metabolism; Lipid Metabolism; Fatty acid elongation in mitochondria                                               |
| Fatty acid metabolism                                      | 255550 | 234546 | Metabolism; Lipid Metabolism; Fatty acid metabolism                                                               |
| Fc gamma R-mediated phagocytosis                           | 14     | 8      | Organismal Systems; Immune System; Fc gamma R-mediated phagocytosis                                               |
| Flagellar assembly                                         | 219164 | 217059 | Cellular Processes; Cell Motility; Flagellar assembly                                                             |
| Flavone and flavonol biosynthesis                          | 98     | 83     | Metabolism; Biosynthesis of Other Secondary Metabolites; Flavone and flavonol biosynthesis                        |
| Flavonoid biosynthesis                                     | 5489   | 4889   | Metabolism; Biosynthesis of Other Secondary Metabolites; Flavonoid biosynthesis                                   |
| Fluorobenzoate degradation                                 | 23521  | 23540  | Metabolism; Xenobiotics Biodegradation and Metabolism; Fluorobenzoate degradation                                 |
| Focal adhesion                                             | 3      | 0      | Cellular Processes; Cell Communication; Focal adhesion                                                            |

|                                                            |         |         |                                                                                                            |
|------------------------------------------------------------|---------|---------|------------------------------------------------------------------------------------------------------------|
| Folate biosynthesis                                        | 127668  | 126240  | Metabolism; Metabolism of Cofactors and Vitamins; Folate biosynthesis                                      |
| Fructose and mannose metabolism                            | 191688  | 193358  | Metabolism; Carbohydrate Metabolism; Fructose and mannose metabolism                                       |
| Function unknown                                           | 554049  | 574876  | Unclassified; Poorly Characterized; Function unknown                                                       |
| G protein-coupled receptors                                | 41      | 38      | Environmental Information Processing; Signaling Molecules and Interaction; G protein-coupled receptors     |
| Galactose metabolism                                       | 127796  | 129493  | Metabolism; Carbohydrate Metabolism; Galactose metabolism                                                  |
| General function prediction only                           | 1051054 | 1030615 | Unclassified; Poorly Characterized; General function prediction only                                       |
| Geraniol degradation                                       | 122235  | 107841  | Metabolism; Metabolism of Terpenoids and Polyketides; Geraniol degradation                                 |
| Germination                                                | 7219    | 2834    | Unclassified; Cellular Processes and Signaling; Germination                                                |
| Glutamatergic synapse                                      | 25197   | 22076   | Organismal Systems; Nervous System; Glutamatergic synapse                                                  |
| Glutathione metabolism                                     | 170412  | 173126  | Metabolism; Metabolism of Other Amino Acids; Glutathione metabolism                                        |
| Glycan biosynthesis and metabolism                         | 22543   | 26326   | Unclassified; Metabolism; Glycan biosynthesis and metabolism                                               |
| Glycerolipid metabolism                                    | 100310  | 94541   | Metabolism; Lipid Metabolism; Glycerolipid metabolism                                                      |
| Glycerophospholipid metabolism                             | 153173  | 149735  | Metabolism; Lipid Metabolism; Glycerophospholipid metabolism                                               |
| Glycine, serine and threonine metabolism                   | 282768  | 268050  | Metabolism; Amino Acid Metabolism; Glycine, serine and threonine metabolism                                |
| Glycolysis / Gluconeogenesis                               | 320875  | 309051  | Metabolism; Carbohydrate Metabolism; Glycolysis / Gluconeogenesis                                          |
| Glycosaminoglycan degradation                              | 8853    | 9555    | Metabolism; Glycan Biosynthesis and Metabolism; Glycosaminoglycan degradation                              |
| Glycosphingolipid biosynthesis - ganglio series            | 5659    | 5978    | Metabolism; Glycan Biosynthesis and Metabolism; Glycosphingolipid biosynthesis - ganglio series            |
| Glycosphingolipid biosynthesis - globo series              | 11336   | 11202   | Metabolism; Glycan Biosynthesis and Metabolism; Glycosphingolipid biosynthesis - globo series              |
| Glycosphingolipid biosynthesis - lacto and neolacto series | 298     | 287     | Metabolism; Glycan Biosynthesis and Metabolism; Glycosphingolipid biosynthesis - lacto and neolacto series |
| Glycosylphosphatidylinositol(GPI)-anchor biosynthesis      | 2       | 4       | Metabolism; Glycan Biosynthesis and Metabolism; Glycosylphosphatidylinositol(GPI)-anchor biosynthesis      |
| Glycosyltransferases                                       | 106532  | 108387  | Metabolism; Glycan Biosynthesis and Metabolism; Glycosyltransferases                                       |
| Glyoxylate and dicarboxylate metabolism                    | 252603  | 244512  | Metabolism; Carbohydrate Metabolism; Glyoxylate and dicarboxylate metabolism                               |
| GnRH signaling pathway                                     | 14      | 8       | Organismal Systems; Endocrine System; GnRH signaling pathway                                               |
| Hematopoietic cell lineage                                 | 19      | 21      | Organismal Systems; Immune System; Hematopoietic cell lineage                                              |
| Histidine metabolism                                       | 156549  | 145249  | Metabolism; Amino Acid Metabolism; Histidine metabolism                                                    |
| Homologous recombination                                   | 187689  | 183896  | Genetic Information Processing; Replication and Repair; Homologous recombination                           |
| Huntington's disease                                       | 41062   | 42226   | Human Diseases; Neurodegenerative Diseases; Huntington's disease                                           |
| Hypertrophic cardiomyopathy (HCM)                          | 687     | 819     | Human Diseases; Cardiovascular Diseases; Hypertrophic cardiomyopathy (HCM)                                 |
| Indole alkaloid biosynthesis                               | 227     | 219     | Metabolism; Biosynthesis of Other Secondary Metabolites; Indole alkaloid biosynthesis                      |
| Influenza A                                                | 10856   | 10859   | Human Diseases; Infectious Diseases; Influenza A                                                           |
| Inorganic ion transport and metabolism                     | 121883  | 126264  | Unclassified; Cellular Processes and Signaling; Inorganic ion transport and metabolism                     |
| Inositol phosphate metabolism                              | 67963   | 68538   | Metabolism; Carbohydrate Metabolism; Inositol phosphate metabolism                                         |
| Insulin signaling pathway                                  | 15523   | 14766   | Organismal Systems; Endocrine System; Insulin signaling pathway                                            |
| Ion channels                                               | 8844    | 8143    | Environmental Information Processing; Signaling Molecules and Interaction; Ion channels                    |

|                                                 |        |        |                                                                                                                    |
|-------------------------------------------------|--------|--------|--------------------------------------------------------------------------------------------------------------------|
| Isoflavonoid biosynthesis                       | 65     | 81     | Metabolism; Biosynthesis of Other Secondary Metabolites; Isoflavonoid biosynthesis                                 |
| Isoquinoline alkaloid biosynthesis              | 18771  | 17901  | Metabolism; Biosynthesis of Other Secondary Metabolites; Isoquinoline alkaloid biosynthesis                        |
| Leishmaniasis                                   | 3      | 2      | Human Diseases; Infectious Diseases; Leishmaniasis                                                                 |
| Leukocyte transendothelial migration            | 2      | 0      | Organismal Systems; Immune System; Leukocyte transendothelial migration                                            |
| Limonene and pinene degradation                 | 124806 | 106823 | Metabolism; Metabolism of Terpenoids and Polyketides; Limonene and pinene degradation                              |
| Linoleic acid metabolism                        | 17996  | 12900  | Metabolism; Lipid Metabolism; Linoleic acid metabolism                                                             |
| Lipid biosynthesis proteins                     | 224010 | 209515 | Metabolism; Lipid Metabolism; Lipid biosynthesis proteins                                                          |
| Lipid metabolism                                | 43006  | 46550  | Unclassified; Metabolism; Lipid metabolism                                                                         |
| Lipoic acid metabolism                          | 19239  | 19067  | Metabolism; Metabolism of Cofactors and Vitamins; Lipoic acid metabolism                                           |
| Lipopolysaccharide biosynthesis                 | 70168  | 81610  | Metabolism; Glycan Biosynthesis and Metabolism; Lipopolysaccharide biosynthesis                                    |
| Lipopolysaccharide biosynthesis proteins        | 108098 | 127979 | Metabolism; Glycan Biosynthesis and Metabolism; Lipopolysaccharide biosynthesis proteins                           |
| Lysine biosynthesis                             | 172254 | 167976 | Metabolism; Amino Acid Metabolism; Lysine biosynthesis                                                             |
| Lysine degradation                              | 167440 | 153704 | Metabolism; Amino Acid Metabolism; Lysine degradation                                                              |
| Lysosome                                        | 14017  | 14966  | Cellular Processes; Transport and Catabolism; Lysosome                                                             |
| MAPK signaling pathway - yeast                  | 12732  | 12841  | Environmental Information Processing; Signal Transduction; MAPK signaling pathway - yeast                          |
| Meiosis - yeast                                 | 14535  | 10199  | Cellular Processes; Cell Growth and Death; Meiosis - yeast                                                         |
| Melanogenesis                                   | 78     | 58     | Organismal Systems; Endocrine System; Melanogenesis                                                                |
| Membrane and intracellular structural molecules | 232502 | 254904 | Unclassified; Cellular Processes and Signaling; Membrane and intracellular structural molecules                    |
| Metabolism of cofactors and vitamins            | 65313  | 65408  | Unclassified; Metabolism; Metabolism of cofactors and vitamins                                                     |
| Metabolism of xenobiotics by cytochrome P450    | 79804  | 79020  | Metabolism; Xenobiotics Biodegradation and Metabolism; Metabolism of xenobiotics by cytochrome P450                |
| Methane metabolism                              | 285822 | 271282 | Metabolism; Energy Metabolism; Methane metabolism                                                                  |
| Mineral absorption                              | 3442   | 2731   | Organismal Systems; Digestive System; Mineral absorption                                                           |
| Mismatch repair                                 | 170389 | 163196 | Genetic Information Processing; Replication and Repair; Mismatch repair                                            |
| N-Glycan biosynthesis                           | 8890   | 7378   | Metabolism; Glycan Biosynthesis and Metabolism; N-Glycan biosynthesis                                              |
| NOD-like receptor signaling pathway             | 4436   | 4311   | Organismal Systems; Immune System; NOD-like receptor signaling pathway                                             |
| Naphthalene degradation                         | 79553  | 67666  | Metabolism; Xenobiotics Biodegradation and Metabolism; Naphthalene degradation                                     |
| Neuroactive ligand-receptor interaction         | 14     | 5      | Environmental Information Processing; Signaling Molecules and Interaction; Neuroactive ligand-receptor interaction |
| Nicotinate and nicotinamide metabolism          | 127550 | 125848 | Metabolism; Metabolism of Cofactors and Vitamins; Nicotinate and nicotinamide metabolism                           |
| Nitrogen metabolism                             | 218601 | 217500 | Metabolism; Energy Metabolism; Nitrogen metabolism                                                                 |
| Nitrotoluene degradation                        | 26554  | 21513  | Metabolism; Xenobiotics Biodegradation and Metabolism; Nitrotoluene degradation                                    |
| Non-homologous end-joining                      | 19315  | 13170  | Genetic Information Processing; Replication and Repair; Non-homologous end-joining                                 |
| Notch signaling pathway                         | 26     | 2      | Environmental Information Processing; Signal Transduction; Notch signaling pathway                                 |
| Novobiocin biosynthesis                         | 36512  | 36099  | Metabolism; Biosynthesis of Other Secondary Metabolites; Novobiocin biosynthesis                                   |
| Nucleotide excision repair                      | 87330  | 77345  | Genetic Information Processing; Replication and Repair; Nucleotide excision repair                                 |
| Nucleotide metabolism                           | 17396  | 20962  | Unclassified; Metabolism; Nucleotide metabolism                                                                    |



|                                                     |        |        |                                                                                                    |
|-----------------------------------------------------|--------|--------|----------------------------------------------------------------------------------------------------|
| One carbon pool by folate                           | 133790 | 130899 | Metabolism; Metabolism of Cofactors and Vitamins; One carbon pool by folate                        |
| Other glycan degradation                            | 29761  | 31313  | Metabolism; Glycan Biosynthesis and Metabolism; Other glycan degradation                           |
| Other ion-coupled transporters                      | 385748 | 405554 | Unclassified; Cellular Processes and Signaling; Other ion-coupled transporters                     |
| Other transporters                                  | 74807  | 82256  | Unclassified; Cellular Processes and Signaling; Other transporters                                 |
| Others                                              | 325688 | 313254 | Unclassified; Metabolism; Others                                                                   |
| Oxidative phosphorylation                           | 382286 | 375190 | Metabolism; Energy Metabolism; Oxidative phosphorylation                                           |
| PPAR signaling pathway                              | 58706  | 50473  | Organismal Systems; Endocrine System; PPAR signaling pathway                                       |
| Pancreatic secretion                                | 14     | 5      | Organismal Systems; Digestive System; Pancreatic secretion                                         |
| Pantothenate and CoA biosynthesis                   | 157710 | 153263 | Metabolism; Metabolism of Cofactors and Vitamins; Pantothenate and CoA biosynthesis                |
| Parkinson's disease                                 | 24533  | 24486  | Human Diseases; Neurodegenerative Diseases; Parkinson's disease                                    |
| Pathogenic Escherichia coli infection               | 2      | 0      | Human Diseases; Infectious Diseases; Pathogenic Escherichia coli infection                         |
| Pathways in cancer                                  | 23646  | 23282  | Human Diseases; Cancers; Pathways in cancer                                                        |
| Penicillin and cephalosporin biosynthesis           | 16519  | 16531  | Metabolism; Biosynthesis of Other Secondary Metabolites; Penicillin and cephalosporin biosynthesis |
| Pentose and glucuronate interconversions            | 151328 | 151407 | Metabolism; Carbohydrate Metabolism; Pentose and glucuronate interconversions                      |
| Pentose phosphate pathway                           | 222603 | 218915 | Metabolism; Carbohydrate Metabolism; Pentose phosphate pathway                                     |
| Peptidases                                          | 457471 | 454581 | Metabolism; Enzyme Families; Peptidases                                                            |
| Peptidoglycan biosynthesis                          | 172213 | 167379 | Metabolism; Glycan Biosynthesis and Metabolism; Peptidoglycan biosynthesis                         |
| Peroxisome                                          | 80275  | 73873  | Cellular Processes; Transport and Catabolism; Peroxisome                                           |
| Pertussis                                           | 29245  | 38148  | Human Diseases; Infectious Diseases; Pertussis                                                     |
| Phagosome                                           | 2      | 0      | Cellular Processes; Transport and Catabolism; Phagosome                                            |
| Phenylalanine metabolism                            | 133372 | 125286 | Metabolism; Amino Acid Metabolism; Phenylalanine metabolism                                        |
| Phenylalanine, tyrosine and tryptophan biosynthesis | 187297 | 187031 | Metabolism; Amino Acid Metabolism; Phenylalanine, tyrosine and tryptophan biosynthesis             |
| Phenylpropanoid biosynthesis                        | 38482  | 40281  | Metabolism; Biosynthesis of Other Secondary Metabolites; Phenylpropanoid biosynthesis              |
| Phosphatidylinositol signaling system               | 28614  | 26390  | Environmental Information Processing; Signal Transduction; Phosphatidylinositol signaling system   |
| Phosphonate and phosphinate metabolism              | 20085  | 20786  | Metabolism; Metabolism of Other Amino Acids; Phosphonate and phosphinate metabolism                |
| Phosphotransferase system (PTS)                     | 130735 | 159632 | Environmental Information Processing; Membrane Transport; Phosphotransferase system (PTS)          |
| Photosynthesis                                      | 74593  | 72329  | Metabolism; Energy Metabolism; Photosynthesis                                                      |
| Photosynthesis - antenna proteins                   | 102    | 72     | Metabolism; Energy Metabolism; Photosynthesis - antenna proteins                                   |
| Photosynthesis proteins                             | 83116  | 80822  | Metabolism; Energy Metabolism; Photosynthesis proteins                                             |
| Phototransduction - fly                             | 2      | 0      | Organismal Systems; Sensory System; Phototransduction - fly                                        |
| Plant-pathogen interaction                          | 36924  | 37233  | Organismal Systems; Environmental Adaptation; Plant-pathogen interaction                           |
| Polycyclic aromatic hydrocarbon degradation         | 41852  | 32155  | Metabolism; Xenobiotics Biodegradation and Metabolism; Polycyclic aromatic hydrocarbon degradation |
| Polyketide sugar unit biosynthesis                  | 34787  | 34407  | Metabolism; Metabolism of Terpenoids and Polyketides; Polyketide sugar unit biosynthesis           |
| Pores ion channels                                  | 196035 | 221591 | Unclassified; Cellular Processes and Signaling; Pores ion channels                                 |
| Porphyrin and chlorophyll metabolism                | 266305 | 261010 | Metabolism; Metabolism of Cofactors and Vitamins; Porphyrin and chlorophyll metabolism             |

|                                                |        |        |                                                                                                               |
|------------------------------------------------|--------|--------|---------------------------------------------------------------------------------------------------------------|
| Prenyltransferases                             | 81839  | 75752  | Metabolism; Metabolism of Terpenoids and Polyketides; Prenyltransferases                                      |
| Primary bile acid biosynthesis                 | 4038   | 2973   | Metabolism; Lipid Metabolism; Primary bile acid biosynthesis                                                  |
| Primary immunodeficiency                       | 13785  | 12457  | Human Diseases; Immune System Diseases; Primary immunodeficiency                                              |
| Prion diseases                                 | 5090   | 5782   | Human Diseases; Neurodegenerative Diseases; Prion diseases                                                    |
| Progesterone-mediated oocyte maturation        | 4409   | 4298   | Organismal Systems; Endocrine System; Progesterone-mediated oocyte maturation                                 |
| Propanoate metabolism                          | 306168 | 284655 | Metabolism; Carbohydrate Metabolism; Propanoate metabolism                                                    |
| Prostate cancer                                | 4413   | 4303   | Human Diseases; Cancers; Prostate cancer                                                                      |
| Proteasome                                     | 7137   | 5559   | Genetic Information Processing; Folding, Sorting and Degradation; Proteasome                                  |
| Protein digestion and absorption               | 2769   | 3023   | Organismal Systems; Digestive System; Protein digestion and absorption                                        |
| Protein export                                 | 143340 | 137261 | Genetic Information Processing; Folding, Sorting and Degradation; Protein export                              |
| Protein folding and associated processing      | 223372 | 228419 | Unclassified; Genetic Information Processing; Protein folding and associated processing                       |
| Protein kinases                                | 124996 | 125669 | Metabolism; Enzyme Families; Protein kinases                                                                  |
| Protein processing in endoplasmic reticulum    | 12701  | 11607  | Genetic Information Processing; Folding, Sorting and Degradation; Protein processing in endoplasmic reticulum |
| Proximal tubule bicarbonate reclamation        | 8966   | 8736   | Organismal Systems; Excretory System; Proximal tubule bicarbonate reclamation                                 |
| Purine metabolism                              | 583293 | 563071 | Metabolism; Nucleotide Metabolism; Purine metabolism                                                          |
| Pyrimidine metabolism                          | 379689 | 366934 | Metabolism; Nucleotide Metabolism; Pyrimidine metabolism                                                      |
| Pyruvate metabolism                            | 340996 | 333323 | Metabolism; Carbohydrate Metabolism; Pyruvate metabolism                                                      |
| RIG-I-like receptor signaling pathway          | 2549   | 1662   | Organismal Systems; Immune System; RIG-I-like receptor signaling pathway                                      |
| RNA degradation                                | 115706 | 113808 | Genetic Information Processing; Folding, Sorting and Degradation; RNA degradation                             |
| RNA polymerase                                 | 34529  | 32601  | Genetic Information Processing; Transcription; RNA polymerase                                                 |
| RNA transport                                  | 14629  | 16221  | Genetic Information Processing; Translation; RNA transport                                                    |
| Regulation of actin cytoskeleton               | 2      | 0      | Cellular Processes; Cell Motility; Regulation of actin cytoskeleton                                           |
| Renal cell carcinoma                           | 8368   | 8126   | Human Diseases; Cancers; Renal cell carcinoma                                                                 |
| Renin-angiotensin system                       | 1654   | 1333   | Organismal Systems; Endocrine System; Renin-angiotensin system                                                |
| Replication, recombination and repair proteins | 213765 | 211362 | Unclassified; Genetic Information Processing; Replication, recombination and repair proteins                  |
| Restriction enzyme                             | 19261  | 21409  | Unclassified; Genetic Information Processing; Restriction enzyme                                              |
| Retinol metabolism                             | 30498  | 28762  | Metabolism; Metabolism of Cofactors and Vitamins; Retinol metabolism                                          |
| Riboflavin metabolism                          | 84451  | 83947  | Metabolism; Metabolism of Cofactors and Vitamins; Riboflavin metabolism                                       |
| Ribosome                                       | 458258 | 438646 | Genetic Information Processing; Translation; Ribosome                                                         |
| Ribosome Biogenesis                            | 318931 | 324262 | Genetic Information Processing; Translation; Ribosome Biogenesis                                              |
| Ribosome biogenesis in eukaryotes              | 12719  | 12123  | Genetic Information Processing; Translation; Ribosome biogenesis in eukaryotes                                |
| Secondary bile acid biosynthesis               | 1154   | 883    | Metabolism; Lipid Metabolism; Secondary bile acid biosynthesis                                                |
| Secretion system                               | 594481 | 638678 | Environmental Information Processing; Membrane Transport; Secretion system                                    |
| Selenocompound metabolism                      | 107656 | 106624 | Metabolism; Metabolism of Other Amino Acids; Selenocompound metabolism                                        |
| Sesquiterpenoid biosynthesis                   | 31     | 10     | Metabolism; Metabolism of Terpenoids and Polyketides; Sesquiterpenoid biosynthesis                            |
| Shigellosis                                    | 101    | 254    | Human Diseases; Infectious Diseases; Shigellosis                                                              |
| Signal transduction mechanisms                 | 138597 | 142904 | Unclassified; Cellular Processes and Signaling; Signal transduction mechanisms                                |
| Small cell lung cancer                         | 10843  | 10856  | Human Diseases; Cancers; Small cell lung cancer                                                               |

|                                                        |         |         |                                                                                                                 |
|--------------------------------------------------------|---------|---------|-----------------------------------------------------------------------------------------------------------------|
| Sphingolipid metabolism                                | 20440   | 20018   | Metabolism; Lipid Metabolism; Sphingolipid metabolism                                                           |
| Sporulation                                            | 34209   | 19078   | Unclassified; Cellular Processes and Signaling; Sporulation                                                     |
| Staphylococcus aureus infection                        | 4572    | 3897    | Human Diseases; Infectious Diseases; Staphylococcus aureus infection                                            |
| Starch and sucrose metabolism                          | 210705  | 214844  | Metabolism; Carbohydrate Metabolism; Starch and sucrose metabolism                                              |
| Steroid biosynthesis                                   | 2459    | 2081    | Metabolism; Lipid Metabolism; Steroid biosynthesis                                                              |
| Steroid hormone biosynthesis                           | 8642    | 7933    | Metabolism; Lipid Metabolism; Steroid hormone biosynthesis                                                      |
| Stilbenoid, diarylheptanoid and gingerol biosynthesis  | 9260    | 6099    | Metabolism; Biosynthesis of Other Secondary Metabolites; Stilbenoid, diarylheptanoid and gingerol biosynthesis  |
| Streptomycin biosynthesis                              | 77150   | 74395   | Metabolism; Biosynthesis of Other Secondary Metabolites; Streptomycin biosynthesis                              |
| Styrene degradation                                    | 39400   | 36520   | Metabolism; Xenobiotics Biodegradation and Metabolism; Styrene degradation                                      |
| Sulfur metabolism                                      | 102251  | 101777  | Metabolism; Energy Metabolism; Sulfur metabolism                                                                |
| Sulfur relay system                                    | 98310   | 98389   | Genetic Information Processing; Folding, Sorting and Degradation; Sulfur relay system                           |
| Synthesis and degradation of ketone bodies             | 56010   | 52430   | Metabolism; Lipid Metabolism; Synthesis and degradation of ketone bodies                                        |
| Systemic lupus erythematosus                           | 151     | 161     | Human Diseases; Immune System Diseases; Systemic lupus erythematosus                                            |
| Taurine and hypotaurine metabolism                     | 41194   | 41235   | Metabolism; Metabolism of Other Amino Acids; Taurine and hypotaurine metabolism                                 |
| Terpenoid backbone biosynthesis                        | 138051  | 129287  | Metabolism; Metabolism of Terpenoids and Polyketides; Terpenoid backbone biosynthesis                           |
| Tetracycline biosynthesis                              | 37137   | 36900   | Metabolism; Metabolism of Terpenoids and Polyketides; Tetracycline biosynthesis                                 |
| Thiamine metabolism                                    | 103728  | 101789  | Metabolism; Metabolism of Cofactors and Vitamins; Thiamine metabolism                                           |
| Tight junction                                         | 2       | 0       | Cellular Processes; Cell Communication; Tight junction                                                          |
| Toluene degradation                                    | 68588   | 67153   | Metabolism; Xenobiotics Biodegradation and Metabolism; Toluene degradation                                      |
| Toxoplasmosis                                          | 10840   | 10869   | Human Diseases; Infectious Diseases; Toxoplasmosis                                                              |
| Transcription factors                                  | 528758  | 551448  | Genetic Information Processing; Transcription; Transcription factors                                            |
| Transcription machinery                                | 202274  | 192314  | Genetic Information Processing; Transcription; Transcription machinery                                          |
| Transcription related proteins                         | 4108    | 5329    | Unclassified; Genetic Information Processing; Transcription related proteins                                    |
| Translation factors                                    | 104440  | 103338  | Genetic Information Processing; Translation; Translation factors                                                |
| Translation proteins                                   | 203172  | 209171  | Unclassified; Genetic Information Processing; Translation proteins                                              |
| Transporters                                           | 1956336 | 1780833 | Environmental Information Processing; Membrane Transport; Transporters                                          |
| Tropane, piperidine and pyridine alkaloid biosynthesis | 37828   | 35249   | Metabolism; Biosynthesis of Other Secondary Metabolites; Tropane, piperidine and pyridine alkaloid biosynthesis |
| Tryptophan metabolism                                  | 211750  | 193192  | Metabolism; Amino Acid Metabolism; Tryptophan metabolism                                                        |
| Tuberculosis                                           | 40780   | 38593   | Human Diseases; Infectious Diseases; Tuberculosis                                                               |
| Two-component system                                   | 710706  | 735064  | Environmental Information Processing; Signal Transduction; Two-component system                                 |
| Type I diabetes mellitus                               | 11448   | 9915    | Human Diseases; Metabolic Diseases; Type I diabetes mellitus                                                    |
| Type II diabetes mellitus                              | 10691   | 10881   | Human Diseases; Metabolic Diseases; Type II diabetes mellitus                                                   |
| Tyrosine metabolism                                    | 151929  | 142109  | Metabolism; Amino Acid Metabolism; Tyrosine metabolism                                                          |
| Ubiquinone and other terpenoid-quinone biosynthesis    | 104409  | 108581  | Metabolism; Metabolism of Cofactors and Vitamins; Ubiquinone and other terpenoid-quinone biosynthesis           |
| Ubiquitin system                                       | 4068    | 3997    | Genetic Information Processing; Folding, Sorting and Degradation; Ubiquitin system                              |
| VEGF signaling pathway                                 | 3       | 2       | Environmental Information Processing; Signal Transduction; VEGF signaling pathway                               |

|                                             |        |        |                                                                                        |
|---------------------------------------------|--------|--------|----------------------------------------------------------------------------------------|
| Valine, leucine and isoleucine biosynthesis | 204742 | 198500 | Metabolism; Amino Acid Metabolism; Valine, leucine and isoleucine biosynthesis         |
| Valine, leucine and isoleucine degradation  | 304808 | 277458 | Metabolism; Amino Acid Metabolism; Valine, leucine and isoleucine degradation          |
| Various types of N-glycan biosynthesis      | 2      | 1      | Metabolism; Glycan Biosynthesis and Metabolism; Various types of N-glycan biosynthesis |
| Vasopressin-regulated water reabsorption    | 4      | 2      | Organismal Systems; Excretory System; Vasopressin-regulated water reabsorption         |
| Vibrio cholerae infection                   | 322    | 392    | Human Diseases; Infectious Diseases; Vibrio cholerae infection                         |
| Vibrio cholerae pathogenic cycle            | 27060  | 28594  | Human Diseases; Infectious Diseases; Vibrio cholerae pathogenic cycle                  |
| Viral myocarditis                           | 10842  | 10854  | Human Diseases; Cardiovascular Diseases; Viral myocarditis                             |
| Vitamin B6 metabolism                       | 55777  | 55272  | Metabolism; Metabolism of Cofactors and Vitamins; Vitamin B6 metabolism                |
| Wnt signaling pathway                       | 26     | 2      | Environmental Information Processing; Signal Transduction; Wnt signaling pathway       |
| Xylene degradation                          | 22660  | 23961  | Metabolism; Xenobiotics Biodegradation and Metabolism; Xylene degradation              |
| Zeatin biosynthesis                         | 8590   | 8209   | Metabolism; Metabolism of Terpenoids and Polyketides; Zeatin biosynthesis              |
| alpha-Linolenic acid metabolism             | 14389  | 14132  | Metabolism; Lipid Metabolism; alpha-Linolenic acid metabolism                          |
| beta-Alanine metabolism                     | 159674 | 145472 | Metabolism; Metabolism of Other Amino Acids; beta-Alanine metabolism                   |
| beta-Lactam resistance                      | 11655  | 12501  | Metabolism; Biosynthesis of Other Secondary Metabolites; beta-Lactam resistance        |
| mRNA surveillance pathway                   | 15     | 1      | Genetic Information Processing; Translation; mRNA surveillance pathway                 |
| p53 signaling pathway                       | 10874  | 10891  | Cellular Processes; Cell Growth and Death; p53 signaling pathway                       |
